# Supplementary material for: Diazocine-functionalized TATA platforms
Source: publisher site journal article supplement (doi:10.3762/bjoc.15.150), 2019-07-05
Supplement: Additional file 1 [file 1860-5397-15-150-S1.pdf]

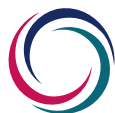

## Supporting Information

for

### **Diazocine-functionalized TATA platforms**

Roland Löw, Talina Rusch, Fynn Röhricht, Olaf Magnussen and Rainer Herges

*Beilstein J. Org. Chem.* **2019**, *15*, 1485–1490. [doi:10.3762/bjoc.15.150](https://doi.org/10.3762/bjoc.15.150)

**Analytical methods, experimental procedures, NMR and UV  
spectra, kinetic studies and DFT calculations**

## **Table of Contents**

I. Analytical equipment and methods

II. Experimental procedures

III. NMR spectra

IV. UV–vis absorption spectra

V. Kinetic studies in solution by  $^1\text{H}$  NMR spectroscopy

VI. DFT Calculations

## I. Analytical equipment and methods

### NMR Spectroscopy

NMR spectra were measured in deuterated solvents (Deutero). All compounds were characterized using  $^1\text{H}$  and  $^{13}\text{C}$  NMR spectroscopy. The signals were assigned using 2D spectroscopy. For  $^1\text{H}$  and  $^{13}\text{C}$  NMR assignment we performed HSQC and HMBC. The degree of deuteration is given in parentheses.  $^1\text{H}$  NMR spectra in reference to the following signals:

chloroform-d (99.8%):  $\delta = 7.26$  ppm. (s)

acetone-d<sub>6</sub> (99.5%):  $\delta = 2.05$  ppm. (quint.)

The signal multiplicities are abbreviated as follows:

s: singlet, d: doublet, dd: double doublet, t: triplet,

Measurements were performed by the following instruments:

Bruker CABAV 500neo ( $^1\text{H}$  NMR: 500 MHz,  $^{13}\text{C}$  NMR: 125 MHz,  $^{29}\text{Si}$  NMR: 99 MHz)

Bruker AV 600 ( $^1\text{H}$  NMR: 600 MHz,  $^{13}\text{C}$  NMR: 150 MHz)

### IR spectroscopy

Infrared spectra were measured on a Perkin-Elmer 1600 Series FT-IR spectrometer with an A531-G Golden-Gate-Diamond-ATR-unit. Signals were abbreviated with w, m, s and for weak, medium and strong intensities. Broad signals are additionally labeled with br.

### Mass spectrometry

The high resolution (HR) mass spectra were measured with an APEX 3 FT-ICR with a 7.05 T magnet by co. Bruker Daltonics. Electron impact (EI).

### Chromatography stationary phases

For column chromatography purifications silica gel (Merck, particle size 0.040–0.063 mm) was used.  $R_f$  values were determined by thin layer chromatography on Polygram® Sil G/UV254 (Macherey-Nagel, 0.2 mm particle size).

## II. Experimental procedures

### II.1 1-Methyl-2-nitro-5-(2-(trimethylsilyl)ethynyl)benzene (5)

In triethylamine (dry, 80 mL) 4-bromo-2-methyl-1-nitrobenzol [1] **3** (6.00 g, 27.8 mmol), trimethylsilylacetylene (5.21 mL, 36.1 mmol), Pd(dppf)Cl<sub>2</sub> (1.02 g, 1.39 mmol, 5%) and copper(I) iodide (530 mg, 2.78 mmol, 10%) were suspended under nitrogen atmosphere and stirred for 1 h at 60 °C. The reaction solution was filtered over celite and the solvent was removed under reduced pressure. The crude product was purified via column chromatography (silica gel, dichloromethane) to obtain a grey solid (6.14 g, 26.3 mmol, 95%).

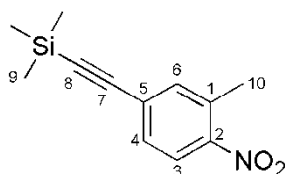

**<sup>1</sup>H NMR** (500.1 MHz, CDCl<sub>3</sub>, 298 K, TMS):  $\delta$  = 7.93 (d, <sup>3</sup>J = 8.4 Hz, 1H, *H*-3), 7.43 (s, 1H, *H*-6), 7.40 (dd, <sup>3</sup>J = 8.5 Hz, <sup>4</sup>J = 1.6 Hz, 1H, *H*-4), 2.58 (s, 3H, *H*-10), 0.27 (s, 9H, *H*-9) ppm.

**<sup>13</sup>C NMR** (125.8 MHz, CDCl<sub>3</sub>, 298 K, CH<sub>3</sub>Cl):  $\delta$  = 148.43 (s, *C*-2), 136.21 (s, *C*-6), 133.98 (s, *C*-1), 130.30 (s, *C*-4), 128.47 (s, *C*-5), 124.93 (s, *C*-3), 102.91 (s, *C*-7), 99.44 (s, *C*-8), 20.53 (s, *C*-10), -0.12 (s, *C*-9) ppm.

**<sup>29</sup>Si NMR** (99.4 MHz, CDCl<sub>3</sub>, 298 K):  $\delta$  = -16.99 ppm.

**MS** (EI, 70eV): *m/z* = 233.09 [M]<sup>+</sup>.

**IR** (ATR):  $\tilde{\nu}$  = 2957 (w), 2159 (w), 1601 (w), 1578 (w), 1515 (s), 1479 (w), 1348 (s), 1244 (s), 949 (m), 834 (vs), 756 (s), 698 (m), 663 (s), 450 (m) cm<sup>-1</sup>.

**m.p.** = 76.5 °C.

**HRMS** (EI, 70 eV): *m/z* [M]<sup>+</sup> calcd. for C<sub>12</sub>H<sub>15</sub>NO<sub>2</sub>Si: 233.08720; found: 233.08700.

### II.2 4-Ethynyl-2-(4-methoxy-2-nitrophenethyl)-1-nitrobenzene (7)

In tetrahydrofuran (abs., 250 mL) 1-methyl-2-nitro-5-(2-(trimethylsilyl)ethynyl)benzene **5** (5.00 g, 21.4 mmol) and 4-methoxy-1-methyl-2-nitrobenzene (**6**, 2.97 mL, 21.4 mmol) were dissolved under nitrogen atmosphere and the solution was cooled to 0 °C. Potassium butoxide (3.40 g, 27.8 mmol) was added and stirred for 3 min before addition of bromine (1.42 mL, 27.8 mmol). After stirring for 5 min, the reaction was poured onto ice/water (500 mL). The solution was extracted with dichloromethane (3 × 300 mL) and the combined organic layers

were washed with saturated sodium thiosulfate solution and saturated sodium chloride solution and then dried over magnesium sulfate. The solvent was removed under reduced pressure and the crude product was purified via column chromatography (silica gel, cyclohexane/ethyl acetate, 2:1) to obtain a beige solid (615 mg, 1.89 mmol, 9%).

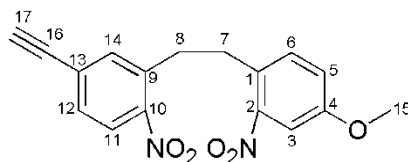

**<sup>1</sup>H NMR** (500.1 MHz, CDCl<sub>3</sub>, 298 K, TMS):  $\delta$  = 7.92 (d, <sup>3</sup>J = 8.5 Hz, 1H, *H*-11), 7.55 (d, <sup>4</sup>J = 1.8 Hz, 1H, *H*-14), 7.50 (d, <sup>4</sup>J = 2.7 Hz, 1H, *H*-3), 7.47 (dd, <sup>3</sup>J = 8.4 Hz, <sup>4</sup>J = 1.8 Hz, 1H, *H*-12), 7.31 (d, <sup>3</sup>J = 8.5 Hz, 1H, *H*-6), 7.11 (dd, <sup>3</sup>J = 8.5 Hz, <sup>4</sup>J = 2.7 Hz, 1H, *H*-5), 3.87 (s, 3H, *H*-15), 3.30 (s, 1H, *H*-17), 3.23-3.13 (m, 4H, *H*-7, *H*-8) ppm.

**<sup>13</sup>C NMR** (125.8 MHz, CDCl<sub>3</sub>, 300 K, TMS):  $\delta$  = 158.61 (s, C-4), 149.43 (s, C-2), 148.63 (s, C-10), 136.49 (s, C-9), 136.01 (s, C-14), 133.27 (s, C-6), 130.94 (s, C-12), 127.76 (s, C-1), 127.59 (s, C-13), 124.98 (s, C-11), 120.28 (s, C-5), 109.35 (s, C-3), 81.55 (s, C-17), 55.85 (s, C-15), 34.36 (s, C-8), 33.79 (s, C-7) ppm.

**MS** (EI, 70eV): *m/z* = 326.08 [M]<sup>+</sup>.

**IR** (ATR):  $\tilde{\nu}$  = 3286 (m), 2939 (br. w), 1602 (s), 1573 (w), 1485 (vs), 1461 (m), 1309 (w), 1278 (s), 1245 (vs), 1156 (w), 1107 (w), 1037 (m), 898 (w), 865 (w), 812 (m), 658 (w), 616 (w) cm<sup>-1</sup>.

**m.p.** = 104.1 °C.

**HRMS** (EI, 70 eV): *m/z* [M]<sup>+</sup> calcd. for C<sub>17</sub>H<sub>14</sub>N<sub>2</sub>O<sub>5</sub>: 326.09027; found: 326.09052.

### II.3 (Z)-2-Ethynyl-8-methoxy-11,12-dihydrodibenzo[c,g][1,2]-diazocine (8)

In ethanol (100 mL) 4-ethynyl-2-(4-methoxy-2-nitrophenethyl)-1-nitrobenzene (**7**, 400 mg, 1.23 mmol) was dissolved, an aqueous solution of barium hydroxide [Ba(OH)<sub>2</sub>·8H<sub>2</sub>O] (1.16 g, 3.68 mmol) in H<sub>2</sub>O (40 mL) and zinc powder (1.29 g, 19.7 mmol) were added. The reaction was refluxed for 4.75 h. The reaction mixture was filtered through celite and the solvent was removed under reduced pressure. The crude product was dissolved in dichloromethane, filtered through celite and the solvent was removed under reduced pressure. The crude product was dissolved in 0.1 M methanolic NaOH solution (120 mL), CuCl<sub>2</sub> (6.60 mg, 49.1 μmol) was added and air was bubbled through the solution for 6 h at room temperature. The reaction was neutralized with 1 M hydrogen chloride solution and saturated sodium bicarbonate solution

(150 mL) was added. The aqueous layer was extracted with dichloromethane (3 × 150 mL) and the solvent was removed under reduced pressure. The crude product was purified via column chromatography (silica gel, cyclohexane/ethyl acetate, 2/1) to obtain an orange solid (51.0 mg, 194 μmol, 16%).

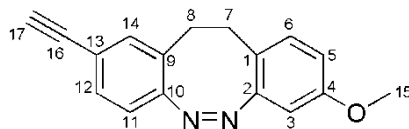

**<sup>1</sup>H NMR** (500.1 MHz, acetone-d<sub>6</sub>, 298 K, TMS): δ = 7.28 (dd, <sup>3</sup>J = 8.1 Hz, <sup>4</sup>J = 1.7 Hz, 1H, H-12), 7.20 (d, <sup>4</sup>J = 1.6 Hz, 1H, H-14), 6.97 (d, <sup>3</sup>J = 8.4 Hz, 1H, H-6), 6.83 (d, <sup>3</sup>J = 8.1 Hz, 1H, H-11), 6.61 (dd, <sup>3</sup>J = 8.4 Hz, <sup>4</sup>J = 2.6 Hz, 1H, H-5), 6.39 (d, <sup>4</sup>J = 2.7 Hz, 1H, H-3), 3.71 (s, 3H, H-15), 3.59 (s, 1H, H-17), 2.87-2.81 (m, 4H, H-7, H-8) ppm.

**<sup>13</sup>C NMR** (125.8 MHz, acetone-d<sub>6</sub>, 298 K, acetone): δ = 159.44 (s, C-4), 157.41 (s, C-2), 156.85 (s, C-10), 134.12 (s, C-14), 131.82 (s, C-6), 131.10 (s, C-12), 130.21 (s, C-9), 121.72 (s, C-13), 120.61 (s, C-1), 119.68 (s, C-11), 113.61 (s, C-5), 104.60 (s, C-3), 83.52 (s, C-16), 79.25 (s, C-17), 55.66 (s, C-15), 31.86 (s, C-8), 31.10 (s, C-7) ppm.

**MS** (EI, 70eV): m/z = 262.11 [M]<sup>+</sup>.

**IR** (ATR):  $\tilde{\nu}$  = 3275 (m), 1605 (w), 1493 (s), 1393 (w), 1251 (m), 1143 (w), 1065 (w), 1030 (vs), 999 (s), 899 (w), 811 (vs), 671 (s), 616 (s), 509 (s) cm<sup>-1</sup>.

**m.p.** = 133.8 °C.

**HRMS** (EI, 70 eV): m/z [M]<sup>+</sup> calcd. for C<sub>17</sub>H<sub>14</sub>N<sub>2</sub>O: 262.11061; found: 262.11019.

#### II.4 (Z)-12c-(8-Methoxy-11,12-dihydrodibenzo(c,g)[(1,2)diazocin-2-yl)ethynyl-4,8,12-tri-n-octyl-4,8,12-triazatriangulene (1)

In tetrahydrofuran (abs., 30 mL) (Z)-2-ethynyl-8-methoxy-11,12-dihydrodibenzo(c,g)(1,2)-diazocine (**8**, 46.0 mg, 175 μmol), octyl-TATA-BF<sub>4</sub> [2] **9** (161 mg, 228 μmol) and powdered potassium hydroxide (105 mg, 1.87 mmol) were suspended under nitrogen atmosphere and refluxed for 3.5 h. The reaction was poured onto saturated sodium chloride solution (20 mL) and the aqueous layer was extracted with diethyl ether (3 × 30 mL). The combined organic layers were dried over magnesium sulfate and the solvent was removed under reduced pressure. The crude product was purified via column chromatography (aluminium oxide, basic, diethylether) to obtain an orange solid (153 mg, 174 μmol, 99%).

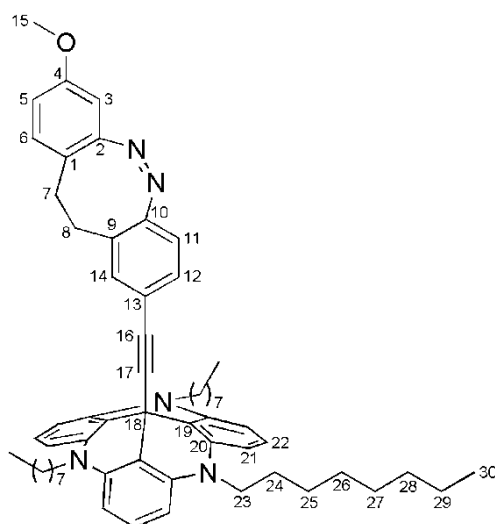

**<sup>1</sup>H NMR** (500.1 MHz, acetone-d<sub>6</sub>, 298 K, TMS):  $\delta$  = 7.18 (t, <sup>3</sup>J = 8.3 Hz, 3H, H-22), 6.85-6.80 (m, 2H, H-6, H-12), 6.72 (d, <sup>4</sup>J = 1.6 Hz, 1H, H-14), 6.65-6.60 (m, 7H, H-11, H-21), 6.47 (dd, <sup>3</sup>J = 8.4 Hz, <sup>4</sup>J = 2.7 Hz, 1H, H-5), 6.26 (d, <sup>4</sup>J = 2.6 Hz, 1H, H-3), 3.99-3.93 (ps. t, 6H, H-23), 3.63 (s, 3H, H-15), 2.76-2.62 (m, 4H, H-7, H-8), 1.84-1.77 (ps. sechst., 6H, H-24), 1.52-1.45 (ps. pent., 6H, H-25), 1.41-1.21 (m, 24H, H-26, H-27, H-28, H-29), 0.90-0.85 (ps. t, 9H, H-30) ppm.

**<sup>13</sup>C NMR** (125.8 MHz, acetone-d<sub>6</sub>, 298 K, acetone):  $\delta$  = 159.31 (s, C-4), 157.40 (s, C-2), 156.04 (s, C-10), 141.34 (s, C-20), 133.14 (s, C-14), 131.61 (s, C-6), 130.32 (s, C-12), 129.81 (s, C-9), 129.38 (s, C-22), 123.01 (s, C-13), 120.62 (s, C-1), 119.25 (s, C-11), 113.28 (s, C-5), 110.82 (s, C-19), 106.03 (s, C-21), 104.50 (s, C-3), 94.77 (s, C-17), 83.72 (s, C-16), 55.56 (s, C-15), 46.72 (s, C-23), 32.58 (s, C-29), 31.77 (s, C-8), 31.01 (s, C-7), 30.11 (s, C-26), 30.06 (s, C-27), 27.43 (s, C-25), 26.62 (s, C-24), 23.33 (s, C-28), 14.40 (s, C-30) ppm.

**MS** (MALDI-TOF, CI-CCA): m/z = 879.6 [M]<sup>+</sup>.

**IR** (ATR):  $\tilde{\nu}$  = 2924 (m), 2852 (m), 1614 (vs), 1579 (vs), 1482 (vs), 1457 (vs), 1393 (vs), 1267 (m), 1242 (s), 1167 (s), 1145 (m), 1036 (w), 895 (w), 809 (w), 772 (m), 748 (m), 726 (s), 657 (w) cm<sup>-1</sup>.

## II.5 4-Ethynyl-1-(5-methoxy-2-nitrophenethyl)-2-nitrobenzene (12)

In tetrahydrofuran (abs., 280 mL) 1-methyl-2-nitro-4-(2-(trimethylsilyl)ethynyl)-benzene (**10**) [3] (6.00 g, 25.7 mmol) and 4-methoxy-2-methyl-1-nitrobenzene (**11**, 6.45 g, 30.9 mmol) were dissolved under nitrogen atmosphere and cooled to 0 °C. Potassium butoxide (4.40 g, 36.0 mmol) was added and stirred for 3 min before addition of bromine (1.84 mL, 36.0 mmol). After stirring for 5 min, the reaction was poured onto ice/water (500 mL). The solution was

extracted with dichloromethane (3 × 300 mL) and the combined organic layers were washed with saturated sodium thiosulfate solution and saturated sodium chloride solution and then dried over magnesium sulfate. The solvent was removed under reduced pressure and the crude product was purified via column chromatography (silica gel, cyclohexane/ethyl acetate, 2/1) to obtain a beige solid (817 mg, 2.50 mmol, 10%).

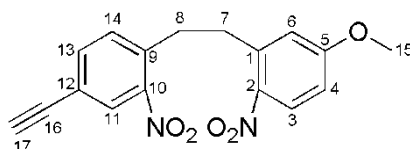

**<sup>1</sup>H NMR** (600.1 MHz, CDCl<sub>3</sub>, 298 K, TMS):  $\delta$  = 8.10 (d, <sup>3</sup>J = 9.0 Hz, 1H, *H*-3), 8.06 (d, <sup>4</sup>J = 1.6 Hz, 1H, *H*-11), 7.63 (dd, <sup>3</sup>J = 8.0 Hz, 1H, *H*-13), 7.44 (d, <sup>3</sup>J = 7.9 Hz, 1H, *H*-14), 6.85 (dd, <sup>3</sup>J = 9.1 Hz, <sup>4</sup>J = 2.8 Hz, 1H, *H*-4), 6.83 (d, <sup>4</sup>J = 2.8 Hz, 1H, *H*-6), 3.88 (s, 3H, *H*-15), 3.30-3.21 (m, 4H, *H*-7, *H*-8), 3.18 (s, 1H, *H*-17) ppm.

**<sup>13</sup>C NMR** (150.9 MHz, CDCl<sub>3</sub>, 298 K, TMS):  $\delta$  = 163.40 (s, *C*-5), 149.01 (s, *C*-10), 141.85 (s, *C*-2), 139.20 (s, *C*-1), 136.67 (s, *C*-9), 136.38 (s, *C*-13), 132.67 (s, *C*-14), 128.24 (s, *C*-11), 127.97 (s, *C*-3), 121.96 (s, *C*-12), 116.85 (s, *C*-4), 112.97 (s, *C*-6), 81.00 (s, *C*-16), 79.56 (s, *C*-17), 55.89 (s, *C*-15), 35.37 (s, *C*-7), 34.14 (s, *C*-8) ppm.

**MS** (EI, 70eV): *m/z* = 326.06 [M]<sup>+</sup>.

**IR** (ATR):  $\tilde{\nu}$  = 3274 (m), 1601 (m), 1586 (m), 1548 (w), 1521 (s), 1500 (s), 1455 (w), 1343 (m), 1327 (vs), 1298 (w), 1258 (vs), 1211 (m), 1077 (m), 1069 (m), 1030 (m), 896 (m), 870 (m), 831 (m), 804 (m), 762 (m), 699 (m) cm<sup>-1</sup>.

**m.p.** = 127.1 °C.

**HRMS** (EI, 70 eV): *m/z* [M]<sup>+</sup> calcd. for C<sub>17</sub>H<sub>14</sub>N<sub>2</sub>O<sub>5</sub>: 326.09027; found: 326.09068.

## II.6 (Z)-8-Ethynyl-2-methoxy-11,12-dihydrodibenzo[c,g][1,2]-diazocine (13)

In ethanol (80 mL) 4-Ethynyl-1-(5-methoxy-2-nitrophenethyl)-2-nitrobenzene (**12**, 396 mg, 1.21 mmol) was dissolved, an aqueous solution of barium hydroxide [Ba(OH)<sub>2</sub>·8H<sub>2</sub>O] (1.15 g, 3.64 mmol) in H<sub>2</sub>O (34 mL) and zinc powder (1.27 g, 19.4 mmol) were added. The reaction was refluxed for 4.75 h. The reaction mixture was filtered through celite and the solvent was removed under reduced pressure. The crude product was dissolved in dichloromethane (50 mL), filtered through celite and the solvent was removed under reduced pressure. The crude product was dissolved in 0.1 M sodium hydroxide solution in methanol (120 mL), CuCl<sub>2</sub> (6.5 mg, 48 μmol) was added and air was bubbled through the solution for 13 h at room



temperature. The reaction was neutralized with 1 M hydrogen chloride solution and saturated sodium bicarbonate solution (200 mL) was added. The aqueous layer was extracted with dichloromethane and the solvent was removed under reduced pressure. The crude product was purified via column chromatography (silica gel, cyclohexane/ethyl acetate, 2:1) to obtain an orange solid (69.0 mg, 263  $\mu\text{mol}$ , 22%).

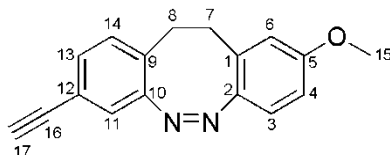

**$^1\text{H NMR}$**  (500.1 MHz,  $\text{CDCl}_3$ , 298 K, TMS):  $\delta$  = 7.15 (dd,  $^3J$  = 7.9 Hz,  $^4J$  = 1.6 Hz, 1H, *H*-13), 6.96 (d,  $^3J$  = 7.8 Hz, 1H, *H*-14), 6.94 (d,  $^4J$  = 1.6 Hz, 1H, *H*-11), 6.83 (d,  $^3J$  = 8.7 Hz, 1H, *H*-3), 6.69 (dd,  $^3J$  = 8.6 Hz,  $^4J$  = 2.6 Hz, 1H, *H*-4), 6.49 (d,  $^4J$  = 2.6 Hz, 1H, *H*-6), 3.71 (s, 3H, *H*-15), 3.03 (s, 1H, *H*-17), 2.85 (m, 4H, *H*-7, *H*-8) ppm.

**$^{13}\text{C NMR}$**  (125.8 MHz,  $\text{CDCl}_3$ , 298 K, TMS):  $\delta$  = 158.36 (s, *C*-5), 155.27 (s, *C*-10), 148.95 (s, *C*-2), 130.61 (s, *C*-13), 129.64 (s, *C*-14), 129.46 (s, *C*-9), 129.15 (s, *C*-1), 122.37 (s, *C*-11), 120.94 (s, *C*-3), 120.54 (s, *C*-12), 114.77 (s, *C*-6), 111.98 (s, *C*-4), 82.71 (s, *C*-16), 77.62 (s, *C*-17), 55.27 (s, *C*-15), 32.08 (s, *C*-7), 31.47 (s, *C*-8) ppm.

**MS** (EI, 70eV):  $m/z$  = 262.11 [ $\text{M}$ ] $^+$ .

**IR** (ATR):  $\tilde{\nu}$  = 3265 (m), 2919 (br. w), 2851 (w), 1609 (w), 1575 (m), 1483 (s), 1464 (m), 1427 (m), 1308 (m), 1259 (vs), 1154 (m), 1110 (m), 1040 (m), 864 (m), 819 (m), 798 (vs), 703 (m), 613 (s), 586 (s)  $\text{cm}^{-1}$ .

**m.p.** = 112.1  $^\circ\text{C}$ .

**HRMS** (EI, 70 eV):  $m/z$  [ $\text{M}$ ] $^+$  calcd. for  $\text{C}_{17}\text{H}_{14}\text{N}_2\text{O}$ : 262.11061; found: 262.11016.

## II.7 (*Z*)-12c-(9-Methoxy-11,12-dihydrodibenzo[*c,g*][1,2]diazocin-3-yl)ethynyl-4,8,12-tri-*n*-octyl-4,8,12-triazatriangulene (2)

In tetrahydrofuran (abs., 10 mL) (*Z*)-8-Ethynyl-2-methoxy-11,12-dihydrodibenzo(*c,g*)(1,2)-diazocine (**13**, 20.0 mg, 76.2  $\mu\text{mol}$ ), octyl-TATA- $\text{BF}_4$  [**2**] **9** (64.6 mg, 91.5  $\mu\text{mol}$ ) and powdered potassium hydroxide (34.2 mg, 610  $\mu\text{mol}$ ) were suspended under nitrogen atmosphere and refluxed for 2 h. The reaction was poured onto saturated sodium chloride solution (30 mL) and extracted with diethylether (3  $\times$  25 mL). The combined organic layers were dried over magnesium sulfate and the solvent was removed under reduced pressure. The crude product

was purified via column chromatography (aluminium oxide, basic, diethylether) to obtain an orange solid (59.0 mg, 67.0  $\mu\text{mol}$ , 88%).

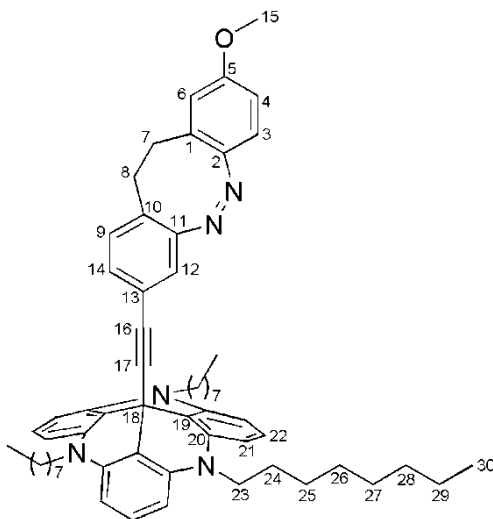

**$^1\text{H NMR}$**  (500.1 MHz, acetone- $d_6$ , 298 K, TMS):  $\delta$  = 7.18 (t,  $^3J$  = 8.24 Hz, 3H, *H*-22), 6.89 (d,  $^3J$  = 8.0 Hz, 1H, *H*-9), 6.71 (dd,  $^3J$  = 8.0 Hz,  $^4J$  = 1.7 Hz, 1H, *H*-14), 6.68 (d,  $^3J$  = 8.5 Hz, 1H, *H*-3), 6.65-6.60 (m, 7H, *H*-4, *H*-21), 6.52 (d,  $^4J$  = 2.6 Hz, 1H, *H*-6), 6.44 (d,  $^4J$  = 1.6 Hz, 1H, *H*-12), 3.99-3.93 (ps. t, 6H, *H*-23), 3.63 (s, 3H, *H*-15), 2.78-2.69 (m, 4H, *H*-7, *H*-8), 1.85-1.76 (ps. pent., 6H, *H*-24), 1.52-1.44 (ps. pent., 6H, *H*-25), 1.41-1.22 (m, 24H, *H*-26, *H*-27, *H*-28, *H*-29), 0.90-0.85 (ps. t, 9H, *H*-30) ppm.

**$^{13}\text{C NMR}$**  (125.8 MHz, acetone- $d_6$ , 298 K, acetone):  $\delta$  = 159.25 (s, C-5), 156.54 (s, C-11), 150.00 (s, C-2), 141.36 (s, C-20), 130.52 (s, C-9), 130.38 (s, C-14), 130.27 (s, C-1), 129.44 (s, C-10), 129.38 (s, C-22), 122.89 (s, C-13), 121.52 (s, C-12), 121.15 (s, C-3), 115.65 (s, C-6), 112.54 (s, C-4), 110.86 (s, C-19), 106.05 (s, C-21), 95.09 (s, C-17), 83.45 (s, C-16), 55.48 (s, C-15), 46.67 (s, C-23), 32.57 (s, C-29), 32.38 (s, C-7), 31.73 (s, C-8), 30.10 (s, C-26), 30.05 (s, C-27), 27.43 (s, C-25), 26.65 (s, C-24), 23.32 (s, C-28), 14.40 (s, C-30) ppm.

**MS** (MALDI-TOF):  $m/z$  = 879.6 [ $M$ ] $^+$ .

**IR** (ATR):  $\tilde{\nu}$  = 2924 (s), 2852 (m), 1614 (s), 1579 (vs), 1482 (vs), 1457 (vs), 1393 (vs), 1374 (m), 1243 (s), 1167 (s), 1039 (w), 911 (w), 807 (w), 772 (m), 750 (s), 724 (s), 657 (w)  $\text{cm}^{-1}$ .

### III. NMR Spectra

#### III.1 1-Methyl-2-nitro-5-(2-(trimethylsilyl)ethynyl)benzene

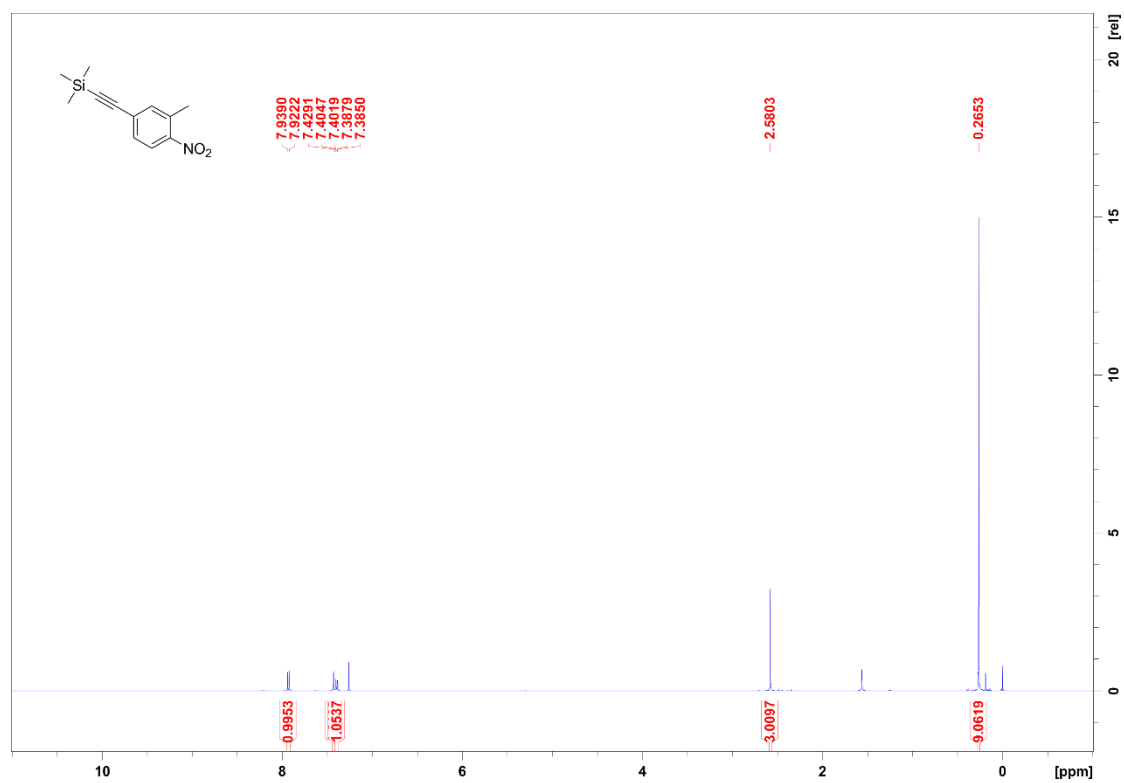

Figure S1. <sup>1</sup>H NMR spectrum (500.1 MHz, CDCl<sub>3</sub>) of compound 5.

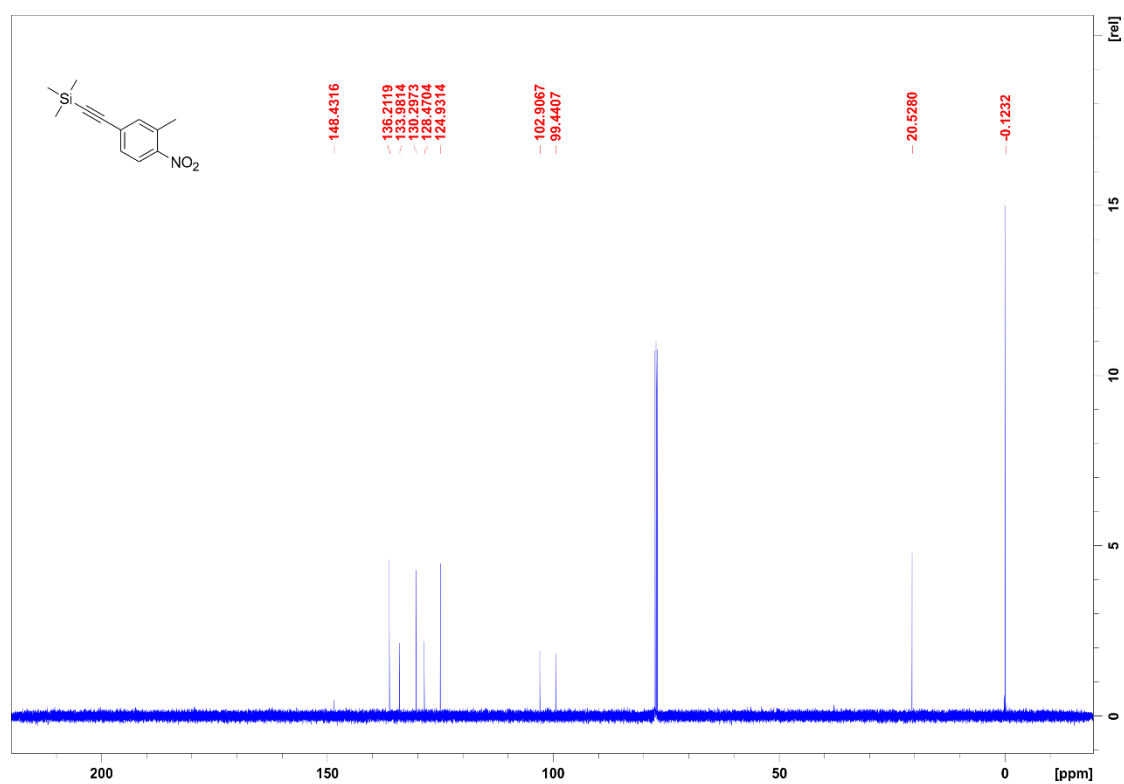

Figure S2. <sup>13</sup>C NMR spectrum (125.8 MHz, CDCl<sub>3</sub>) of compound 5.

### III.2 4-Ethynyl-2-(4-methoxy-2-nitrophenethyl)-1-nitrobenzene

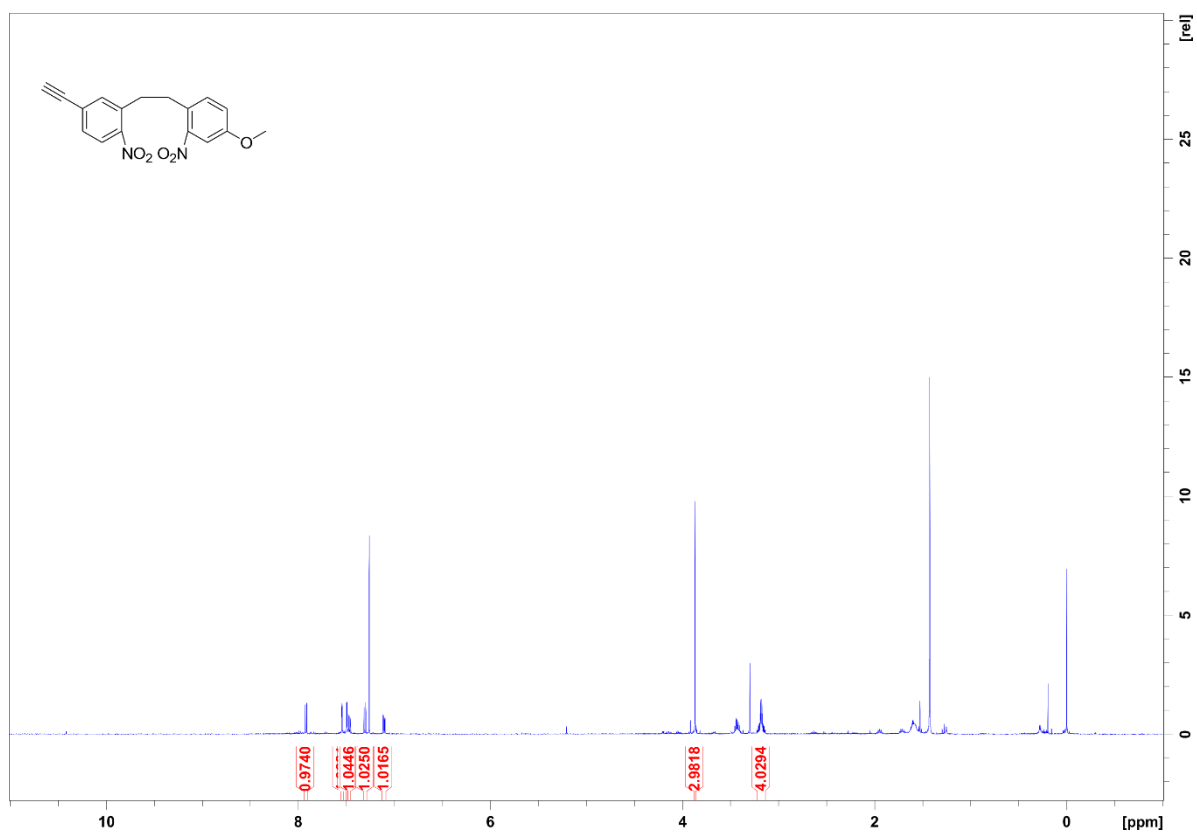

Figure S3. <sup>1</sup>H NMR spectrum (500.1 MHz, CDCl<sub>3</sub>) of compound 7.

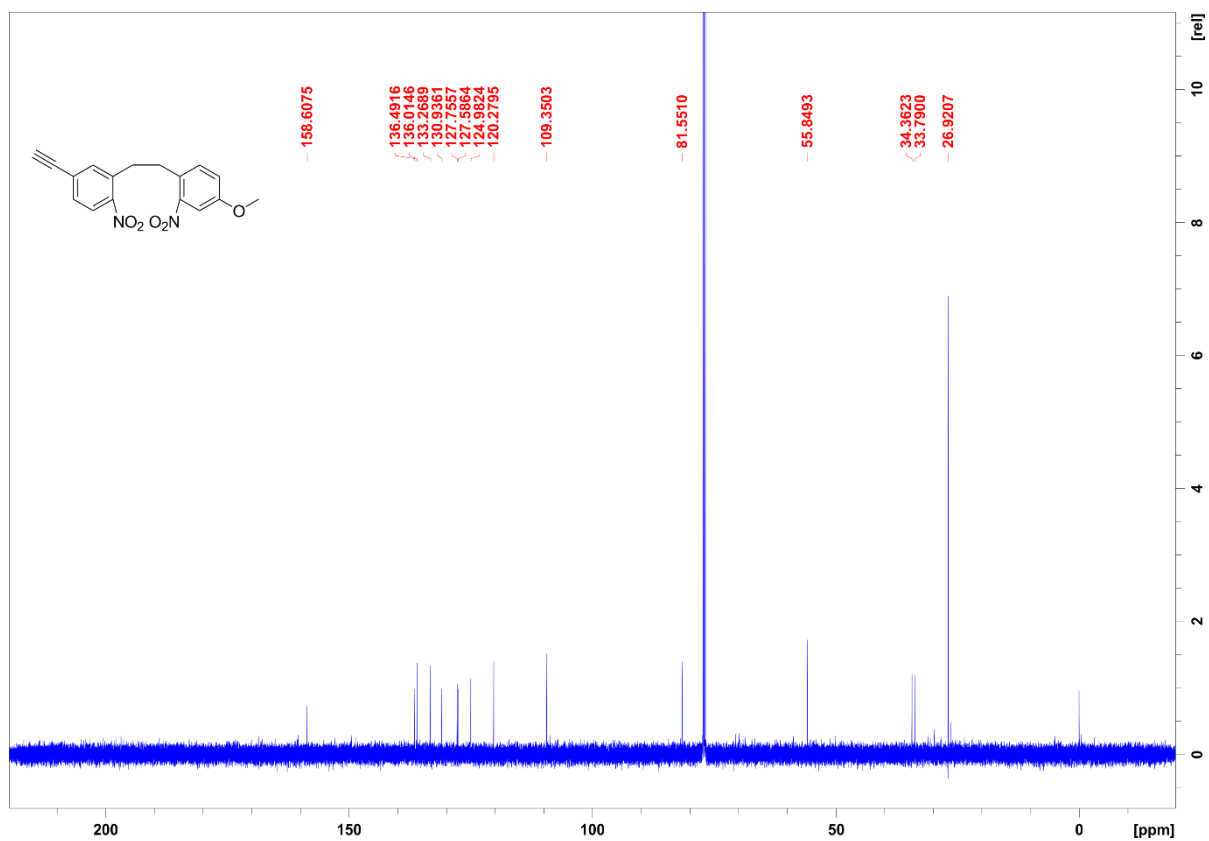

Figure S4. <sup>13</sup>C NMR spectrum (125.8 MHz, CDCl<sub>3</sub>) of compound 7.

### III.3 (Z)-2-Ethynyl-8-methoxy-11,12-dihydrodibenzo[c,g][1,2]-diazocine

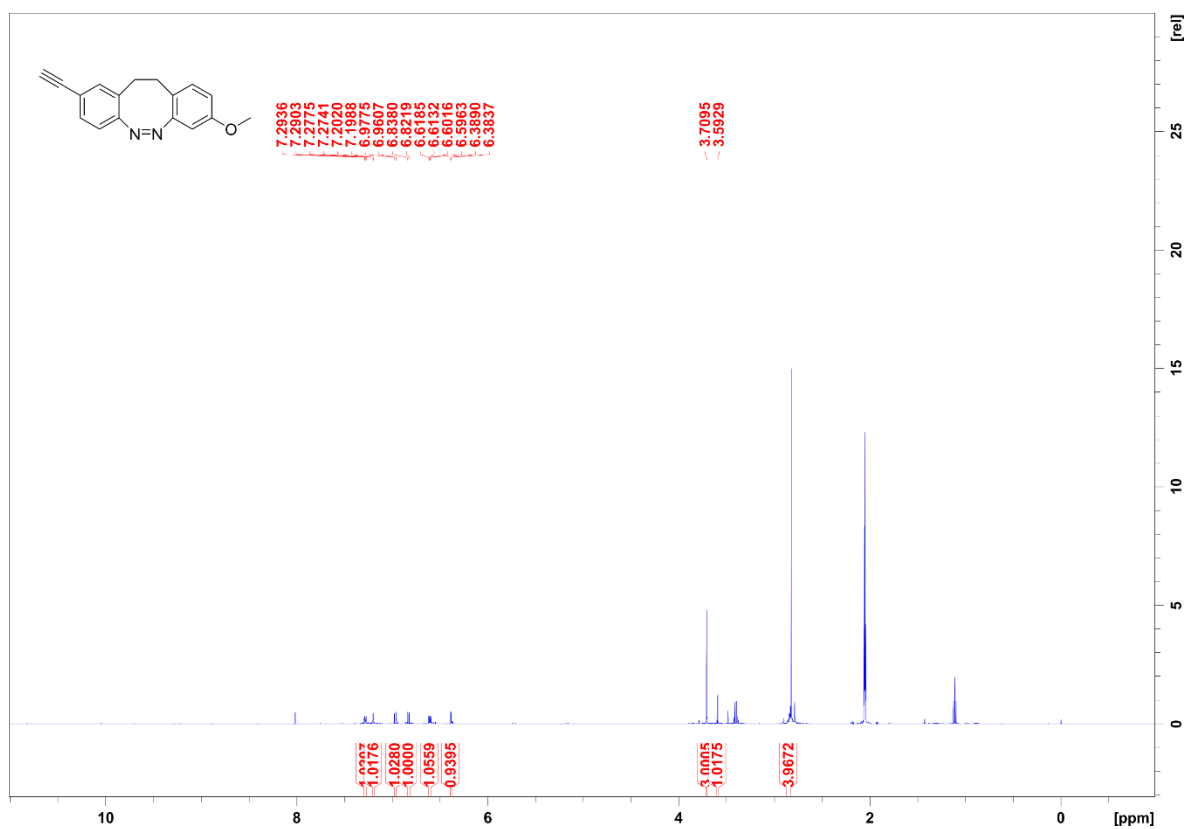

Figure S5. <sup>1</sup>H NMR spectrum (500.1 MHz, acetone-d<sub>6</sub>) of compound 8.

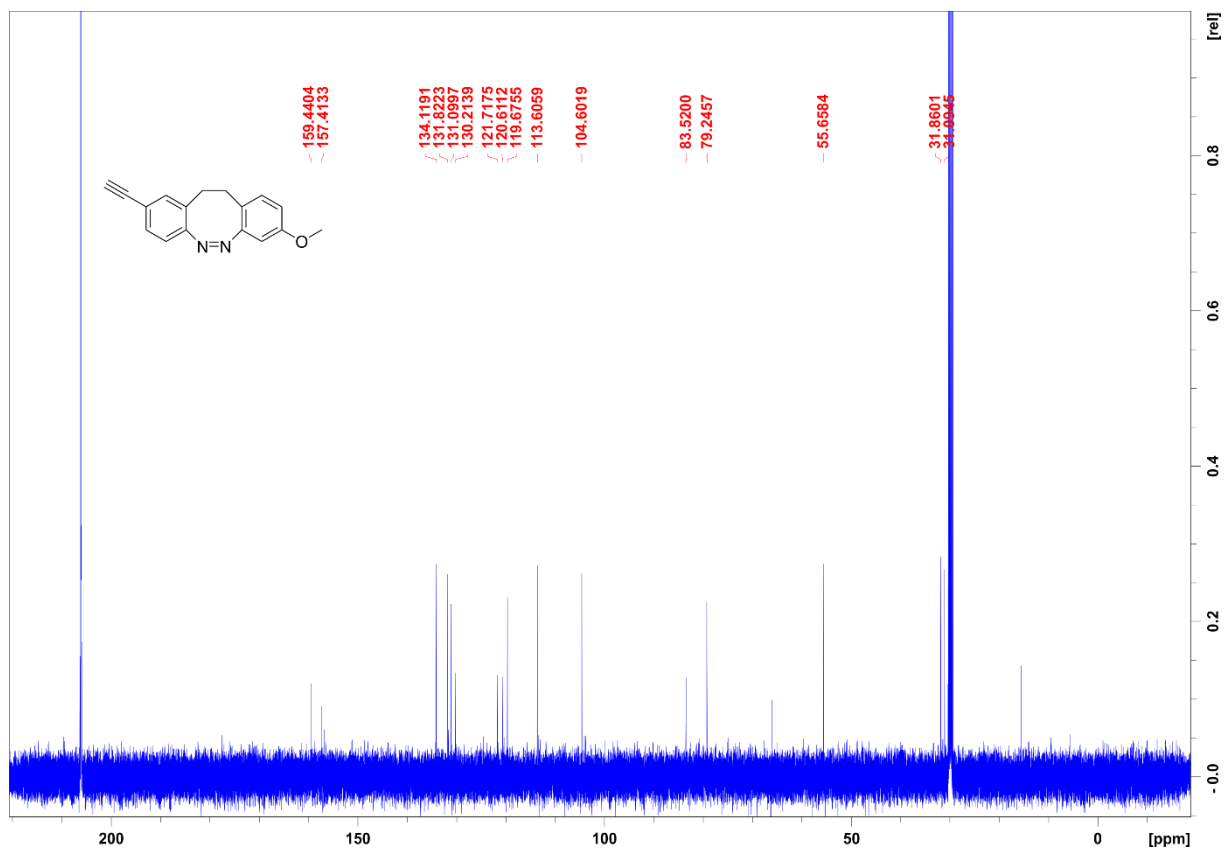

Figure S6. <sup>13</sup>C NMR spectrum (125.8 MHz, acetone-d<sub>6</sub>) of compound 8.

III.4 (Z)-12c-(8-Methoxy-11,12-dihydrobenzo[c,g][1,2]diazocin-2-yl)ethynyl-4,8,12-tri-*n*-octyl-4,8,12-triazatriangulene

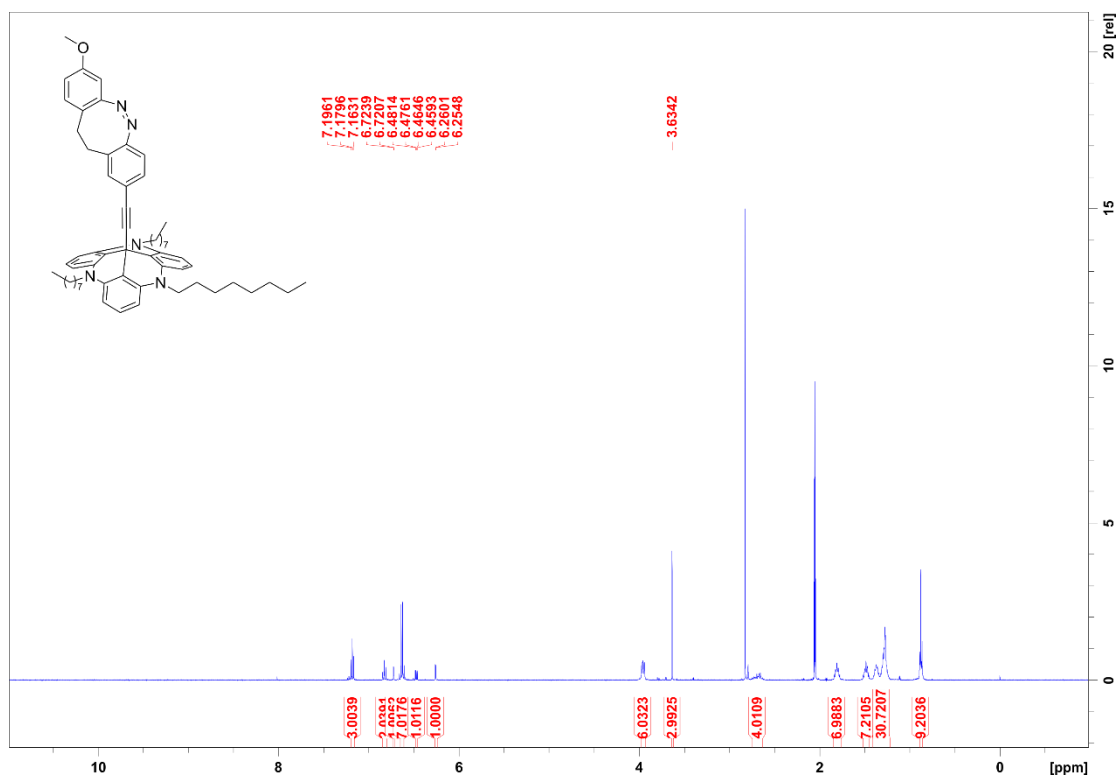

Figure S7. <sup>1</sup>H NMR spectrum (500.1 MHz, acetone-d<sub>6</sub>) of compound 1.

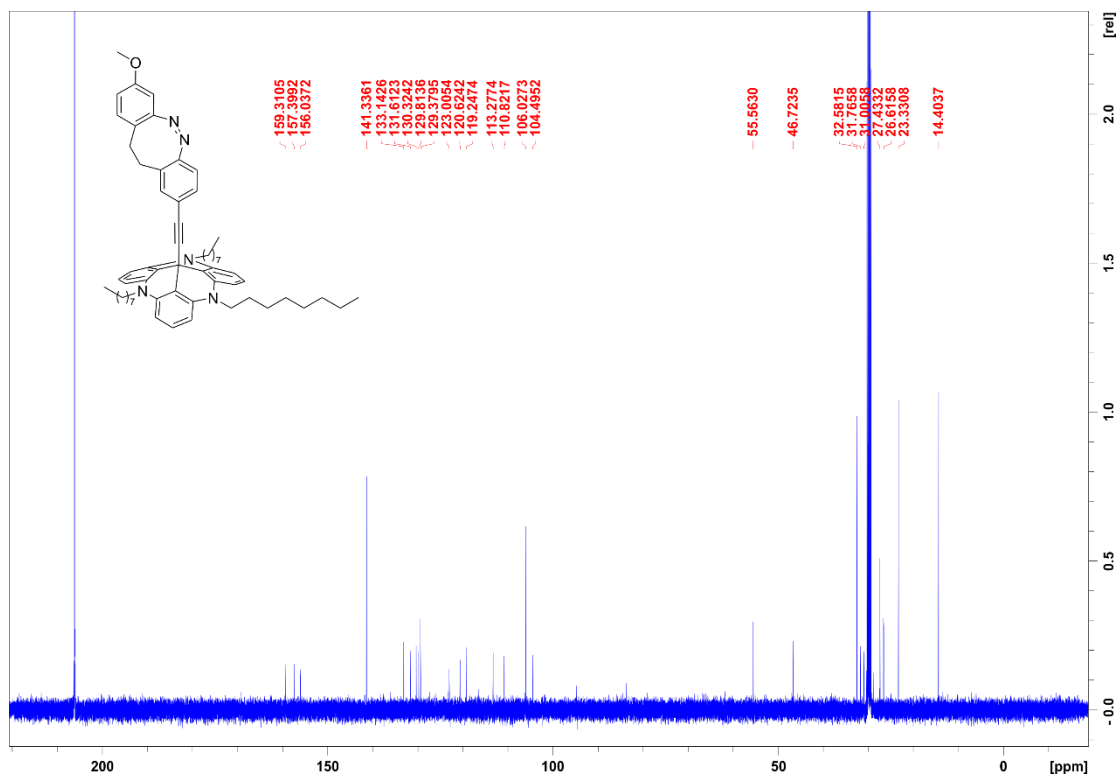

Figure S8. <sup>13</sup>C NMR spectrum (125.8 MHz, acetone-d<sub>6</sub>) of compound 1.

### III.5 4-Ethynyl-1-(5-methoxy-2-nitrophenethyl)-2-nitrobenzene

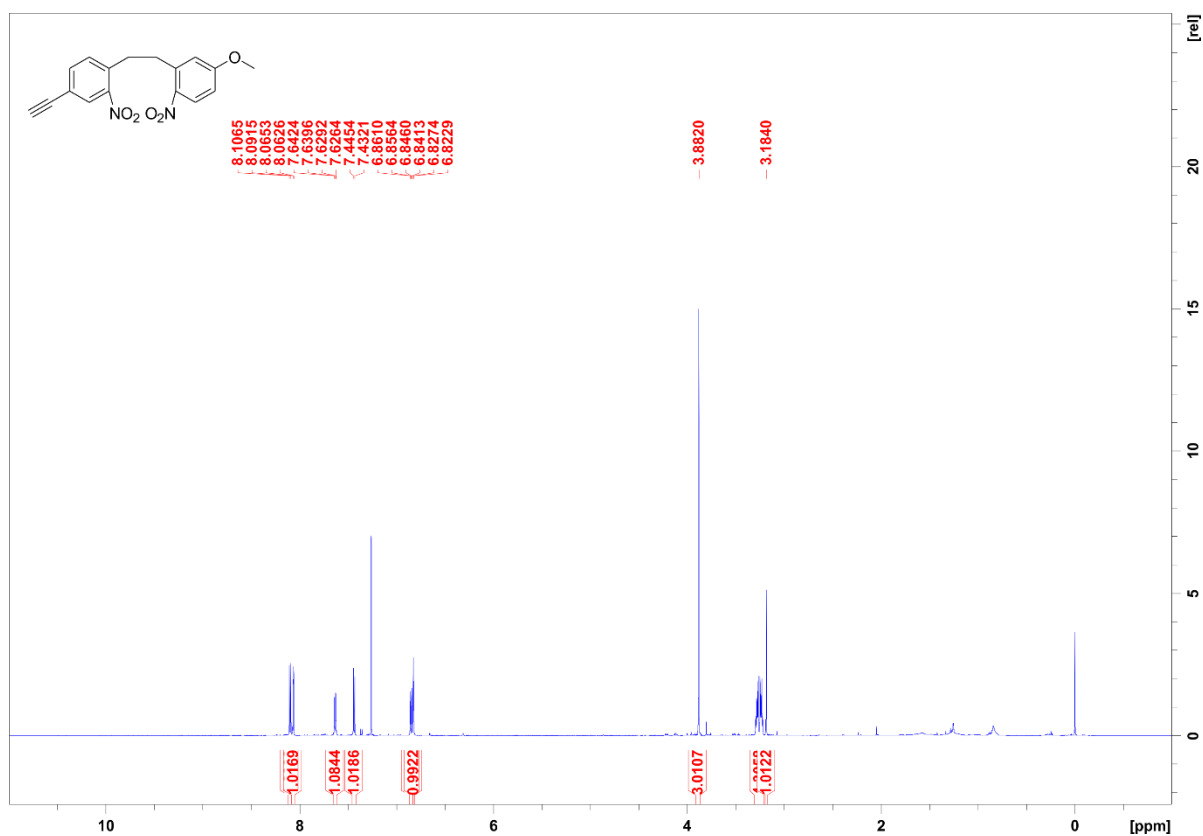

Figure S9. <sup>1</sup>H NMR spectrum (600.1 MHz, CDCl<sub>3</sub>) of compound 12.

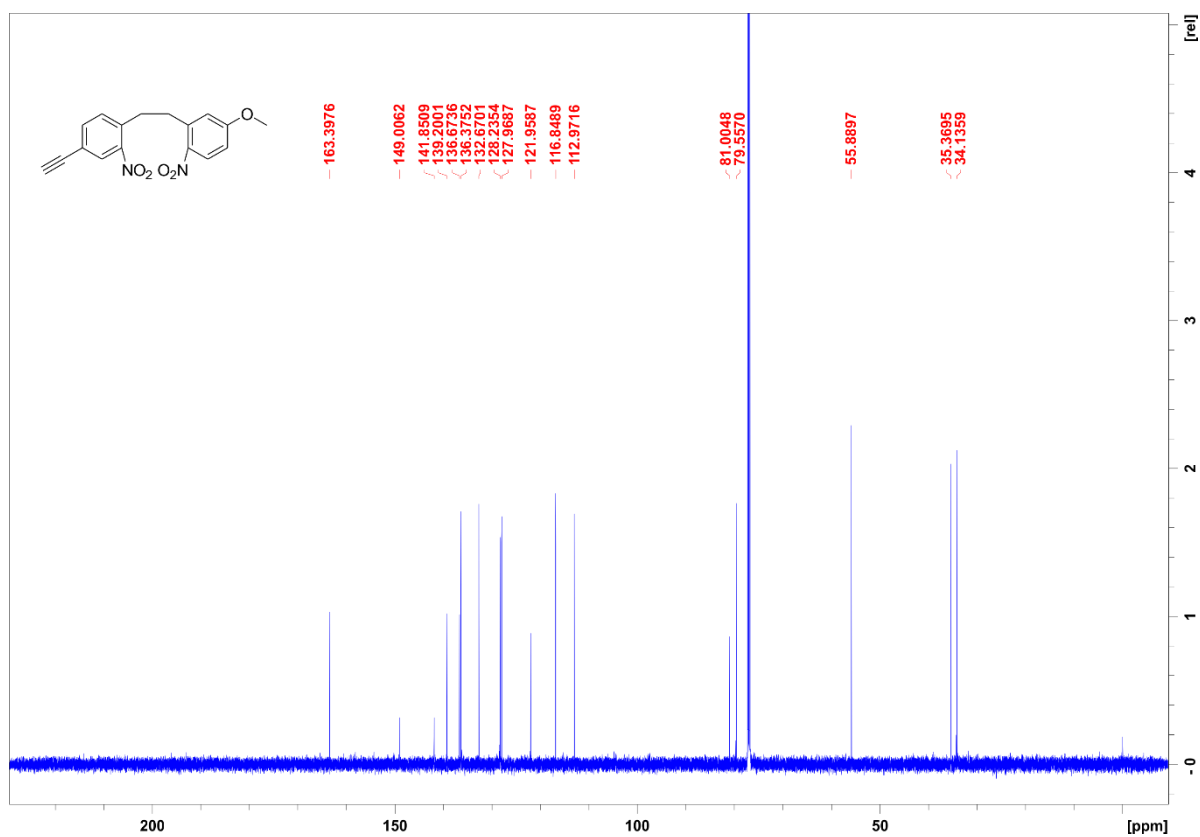

Figure S10. <sup>13</sup>C NMR spectrum (150.9 MHz, CDCl<sub>3</sub>) of compound 12.

### III.6 (Z)-8-Ethynyl-2-methoxy-11,12-dihydrodibenzo[c,g][1,2]diazocine

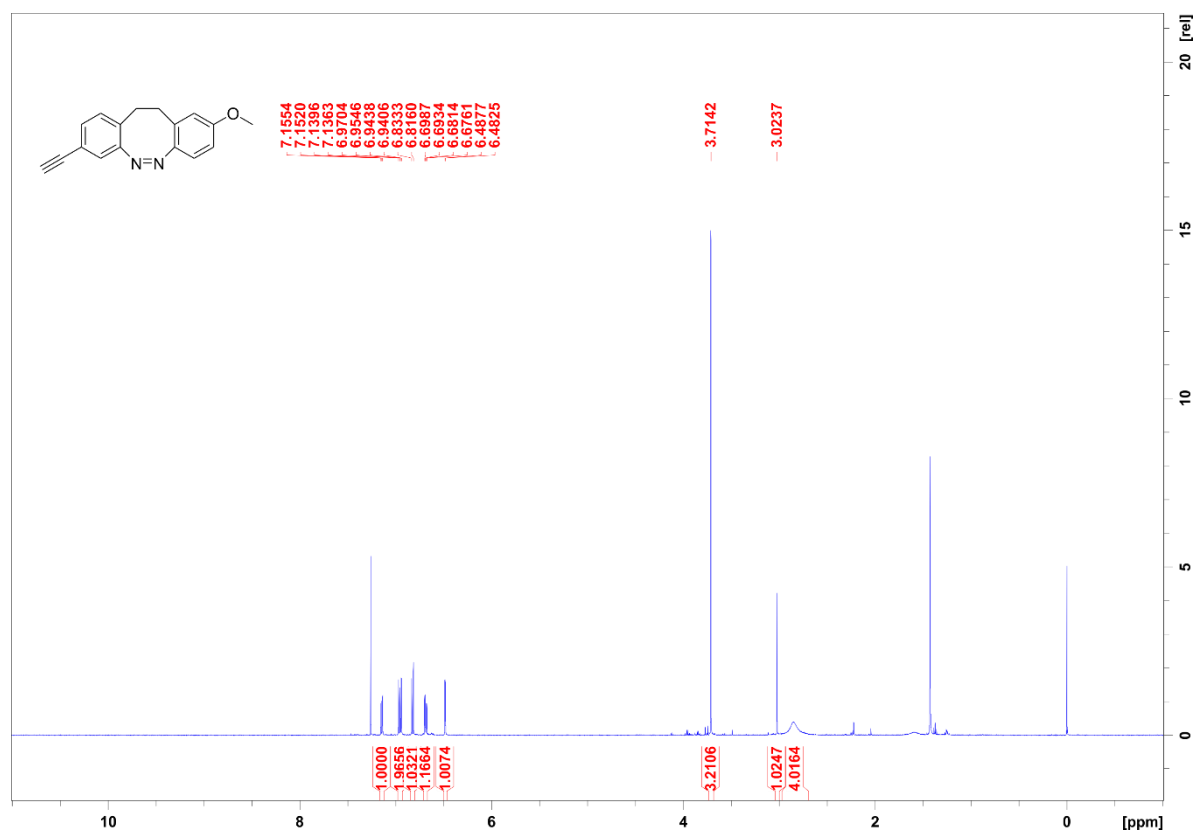

Figure S11. <sup>1</sup>H NMR spectrum (500.1 MHz, CDCl<sub>3</sub>) of compound 13.

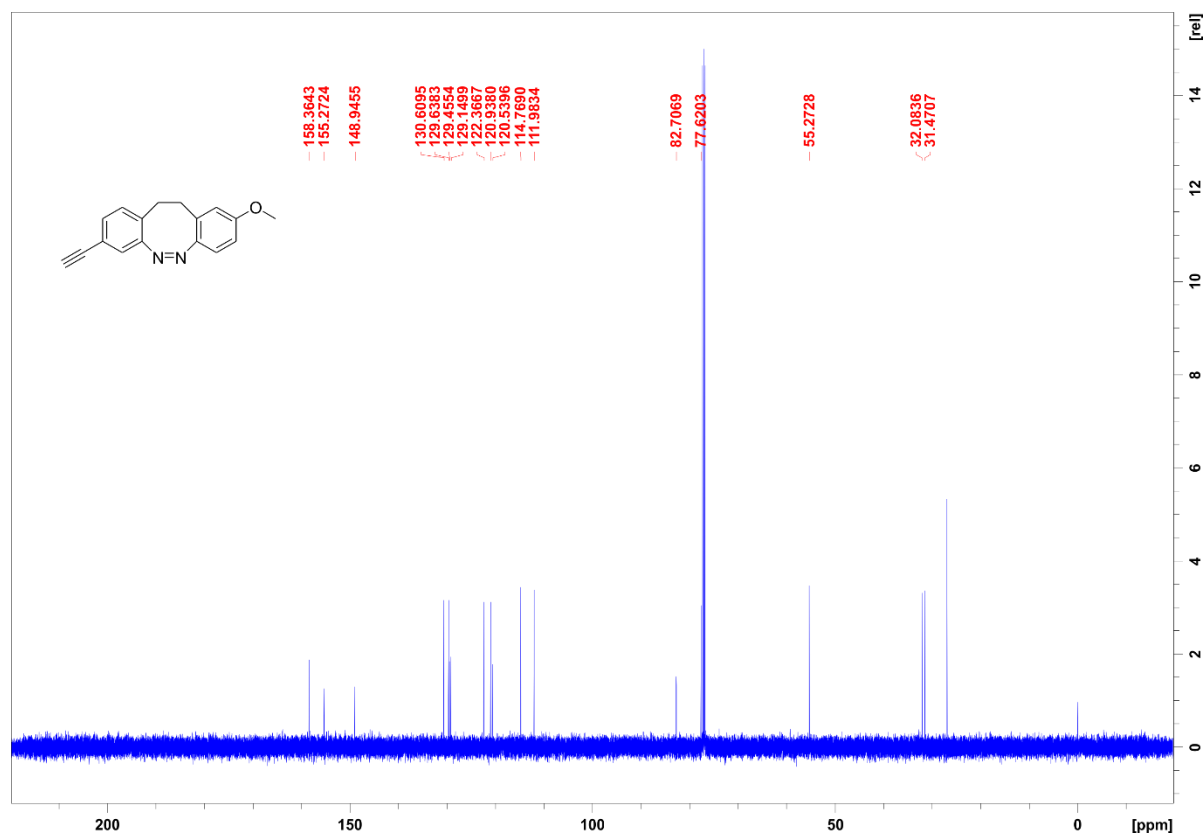

Figure S12. <sup>13</sup>C NMR spectrum (125.8 MHz, CDCl<sub>3</sub>) of compound 13.



III.7 (Z)-12c-(9-Methoxy-11,12-dihydrobenzo[c,g][1,2]diazocin-3-yl)ethynyl-4,8,12-tri-*n*-octyl-4,8,12-triazatriangulene

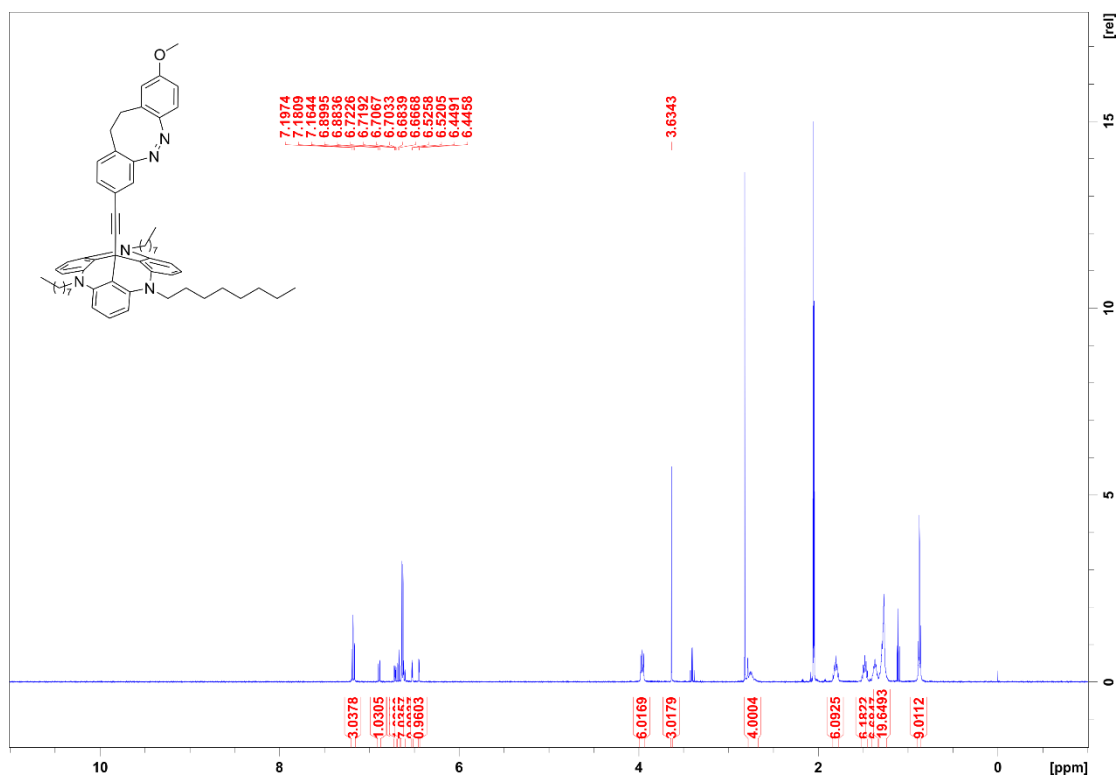

Figure S13. <sup>1</sup>H NMR spectrum (500.1 MHz, acetone-d<sub>6</sub>) of compound 2.

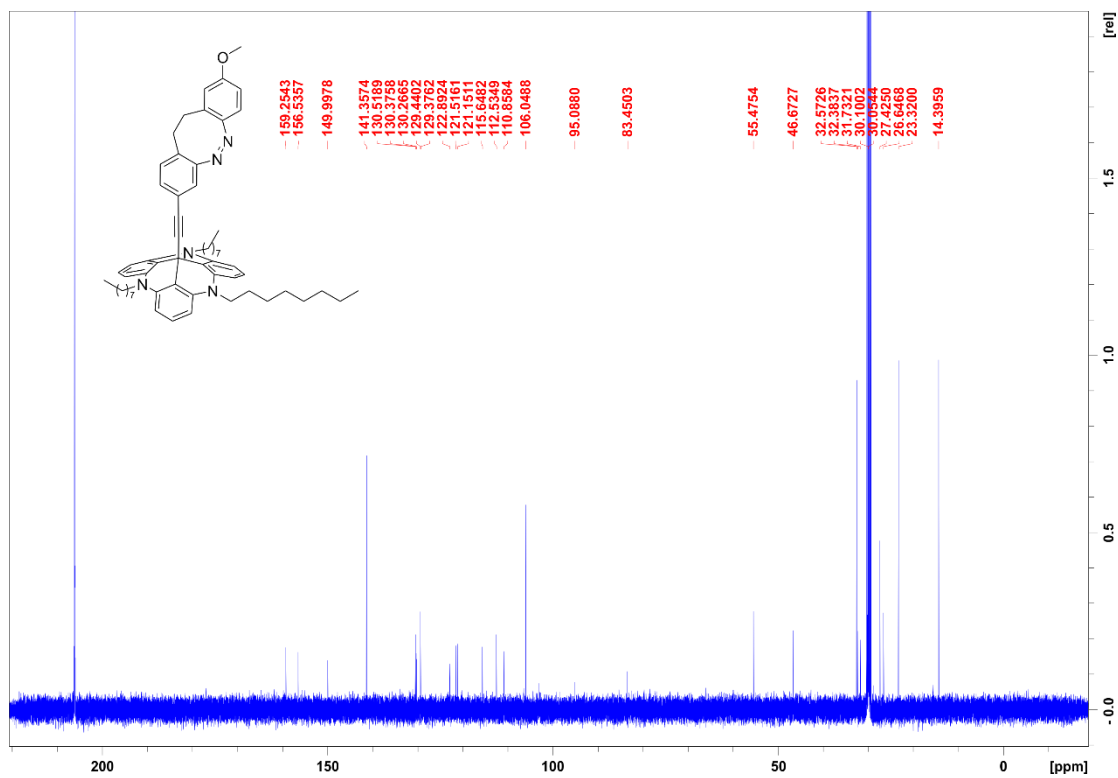

Figure S14. <sup>13</sup>C NMR spectrum (125.8 MHz, acetone-d<sub>6</sub>) of compound 2.

## IV. UV–vis absorption spectra

### IV.1 Methods

UV-Vis spectra were recorded on a PerkinElmer Lambda 650 Photospectrometer in a 1 cm path length quartz cuvette. Irradiation of UV–vis samples were carried out at 25 °C using a custom-made LED positioned at a distance of 1 cm from the sample.

### IV.2 UV–vis spectra

#### Compound 1:

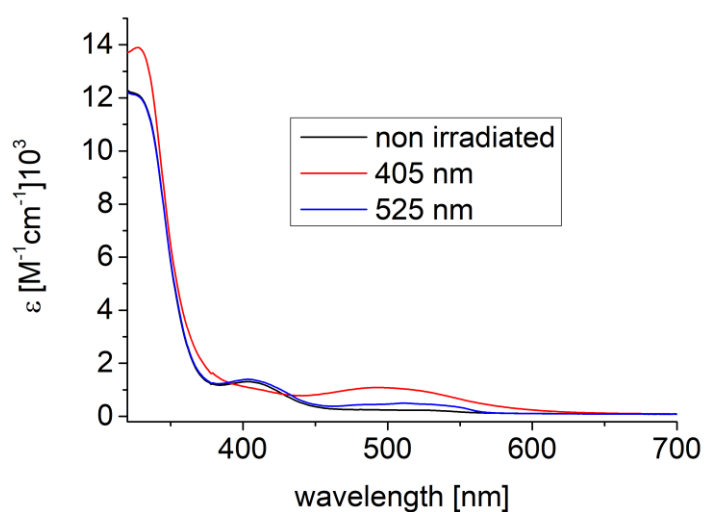

**Figure S15.** UV–vis spectra of compound **1** in tetrahydrofuran at room temperature (68  $\mu\text{mol/L}$ ). Upon irradiation with 405 nm and 525 nm.

#### Compound 2:

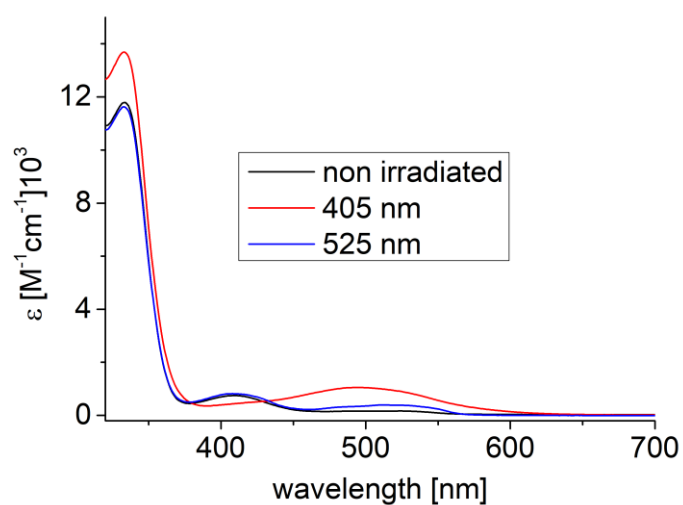

**Figure S16.** UV–vis spectra of compound **2** in tetrahydrofuran at room temperature (68  $\mu\text{mol/L}$ ). Upon irradiation with 405 nm and 525 nm.

## V. Kinetic studies in solution by $^1\text{H}$ NMR spectroscopy

### V.1 Thermal isomerization measurements by $^1\text{H}$ NMR

#### V.1.1 Compound 1: (Z)-12c-(8-methoxy-11,12-dihydrodibenzo[c,g][1,2]diazocin-2-yl)ethynyl-4,8,12-tri-*n*-octyl-4,8,12-triazatriangulene

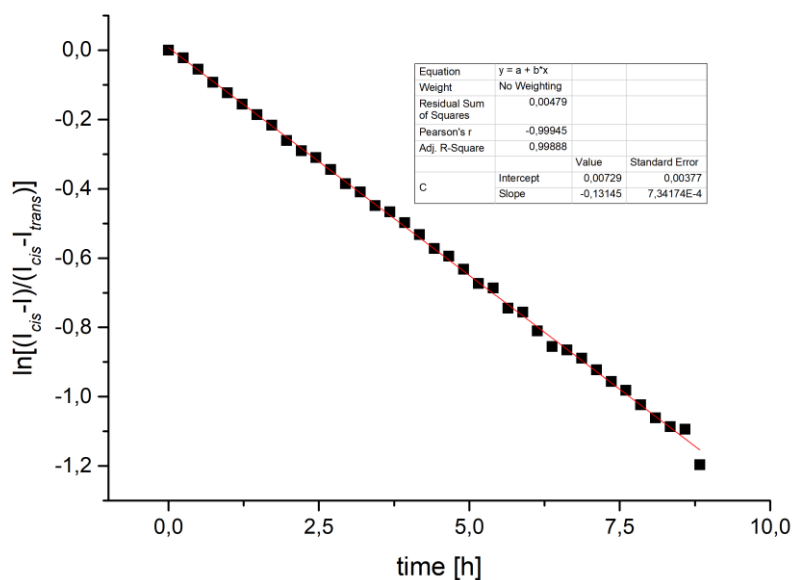

**Figure S17.** Determination of the thermal isomerization rate  $k$  of  $\mathbf{1b} \rightarrow \mathbf{1a}$  by  $^1\text{H}$  NMR spectroscopy (deuterated toluene, 290.5 K, 2.05 mmol/L). ( $I_{\text{cis}}-I$ ):  $^1\text{H}$  NMR integral of the  $\text{CH}_3$  signal of the methoxy group at time  $t$ , ( $I_{\text{cis}}-I_{\text{trans}}$ ) corresponding  $^1\text{H}$  integral at  $t = 0$ . A rate constant of  $k = 0.131 \text{ [s}^{-1}\text{]}$  was determined from a linear fit of the  $\ln[(I_{\text{cis}}-I)/(I_{\text{cis}}-I_{\text{trans}})]/t$  curve. The half-life of  $\mathbf{1}$  at 290.5 K in toluene was determined as 5.27 h.

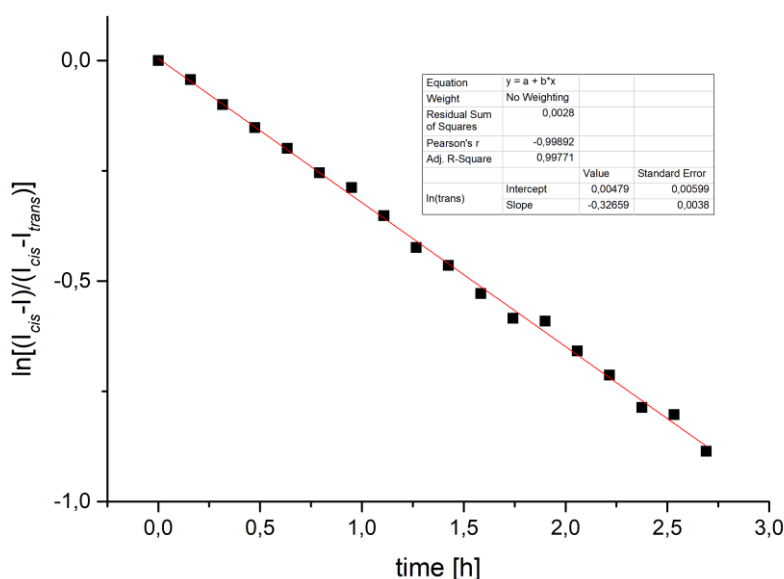

**Figure S18.** Determination of the thermal isomerization rate  $k$  of  $\mathbf{1b} \rightarrow \mathbf{1a}$  by  $^1\text{H}$  NMR spectroscopy (deuterated toluene, 298 K, 2.05 mmol/L). ( $I_{\text{cis}}-I$ ):  $^1\text{H}$  NMR integral of the  $\text{CH}_3$  signal of the methoxy group at time  $t$ , ( $I_{\text{cis}}-I_{\text{trans}}$ ) corresponding  $^1\text{H}$  integral at  $t = 0$ . A rate constant of  $k = 0.327 \text{ [s}^{-1}\text{]}$  was determined from a linear fit of the  $\ln[(I_{\text{cis}}-I)/(I_{\text{cis}}-I_{\text{trans}})]/t$  curve. The half-life of  $\mathbf{1}$  at 298 K in toluene was determined as 2.12 h.

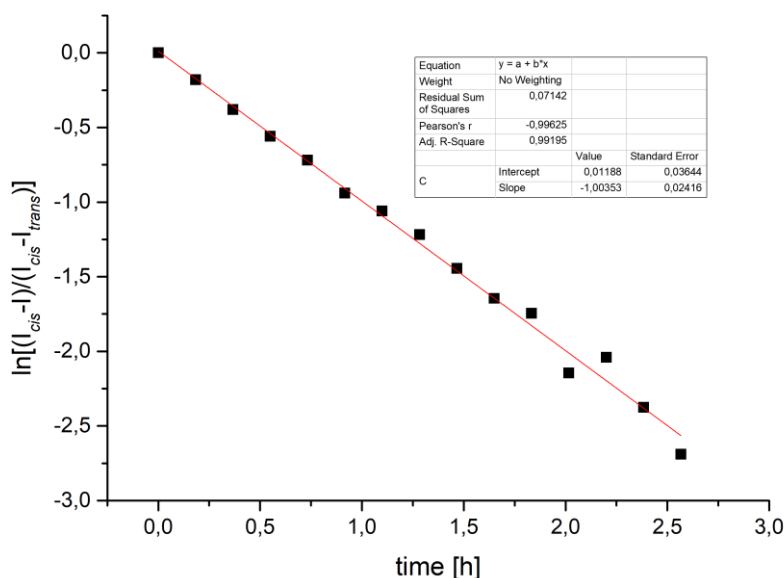

**Figure S19.** Determination of the thermal isomerization rate  $k$  of  $\mathbf{1b} \rightarrow \mathbf{1a}$  by  $^1\text{H}$  NMR spectroscopy (deuterated toluene, 308 K, 2.05 mmol/L). ( $I_{\text{cis}}-I$ ):  $^1\text{H}$  NMR integral of the  $\text{CH}_3$  signal of the methoxy group at time  $t$ , ( $I_{\text{cis}}-I_{\text{trans}}$ ) corresponding  $^1\text{H}$  integral at  $t = 0$ . A rate constant of  $k = 1.00 \text{ [s}^{-1}\text{]}$  was determined from a linear fit of the  $\ln[(I_{\text{cis}}-I)/(I_{\text{cis}}-I_{\text{trans}})]/t$  curve. The half-life of  $\mathbf{1}$  at 308 K in toluene was determined as 0.69 h.

V.1.2 Compound 2: (Z)-12c-(9-methoxy-11,12-dihydrodibenzo(c,g)(1,2)diazocin-3-yl)ethynyl-4,8,12-tri-*n*-octyl-4,8,12-triazatriangulene

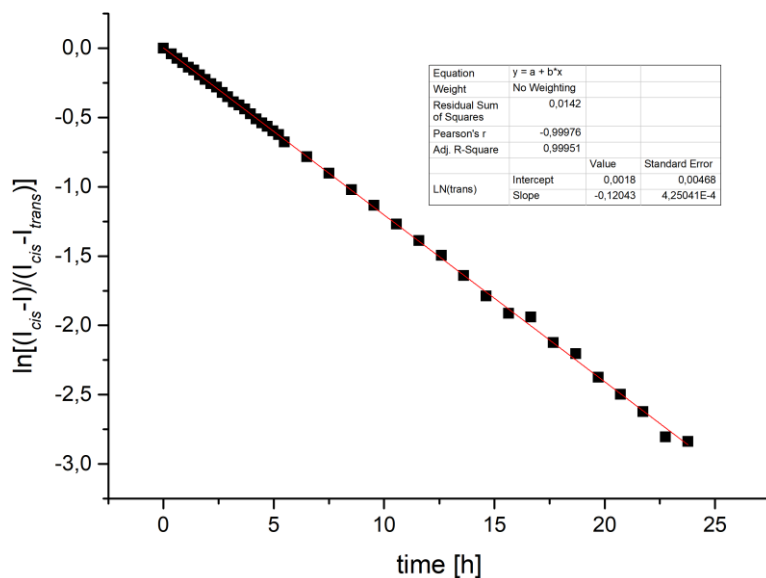

**Figure S20.** Determination of the thermal isomerization rate  $k$  of **2b**→**2a** by  $^1\text{H}$  NMR spectroscopy (deuterated toluene, 290.5 K, 2.27 mmol/L). ( $I_{cis}-I$ ):  $^1\text{H}$  NMR integral of the  $\text{CH}_3$  signal of the methoxy group at time  $t$ , ( $I_{cis}-I_{trans}$ ) corresponding  $^1\text{H}$  integral at  $t = 0$ . A rate constant of  $k = 0.120 \text{ [s}^{-1}\text{]}$  was determined from a linear fit of the  $\ln[(I_{cis}-I)/(I_{cis}-I_{trans})]/t$  curve. The half-life of **2** at 290.5 K in toluene was determined as 5.76 h.

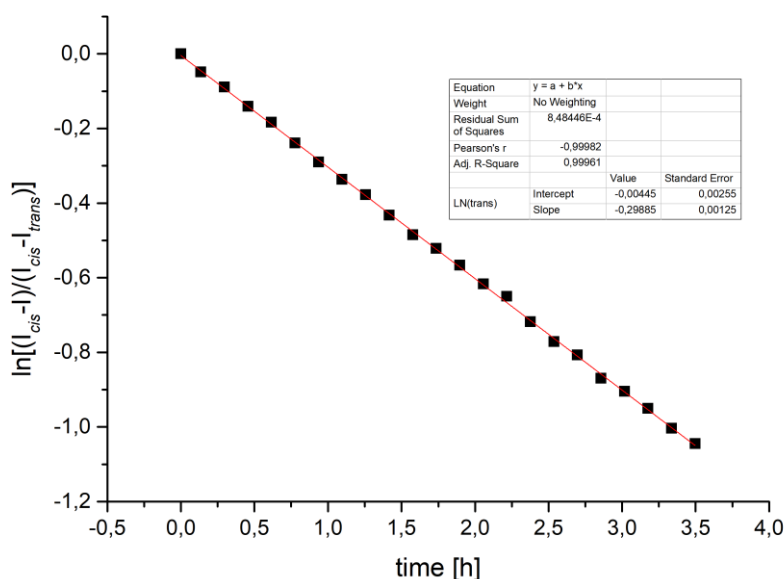

**Figure S21.** Determination of the thermal isomerization rate  $k$  of **2b**→**2a** by  $^1\text{H}$  NMR spectroscopy (deuterated toluene, 298 K, 2.27 mmol/L). ( $I_{cis}$ -I):  $^1\text{H}$  NMR integral of the  $\text{CH}_3$  signal of the methoxy group at time  $t$ , ( $I_{cis}$ - $I_{trans}$ ) corresponding  $^1\text{H}$  integral at  $t = 0$ . A rate constant of  $k = 0.299 \text{ [s}^{-1}\text{]}$  was determined from a linear fit of the  $\ln[(I_{cis}-I)/(I_{cis}-I_{trans})]/t$  curve. The half-life of **2** at 298 K in toluene was determined as 2.32 h.

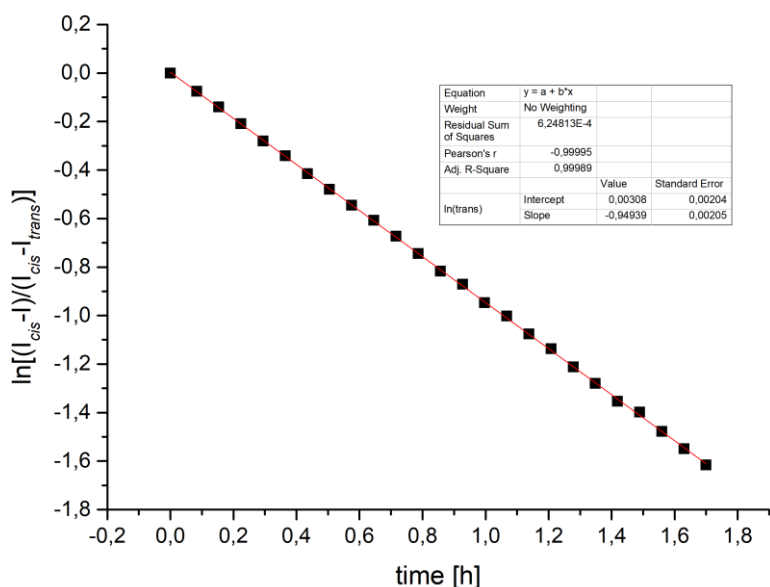

**Figure S22.** Determination of the thermal isomerization rate  $k$  of **2b**→**2a** by  $^1\text{H}$  NMR spectroscopy (deuterated toluene, 308 K, 2.27 mmol/L). ( $I_{cis}$ -I):  $^1\text{H}$  NMR integral of the  $\text{CH}_3$  signal of the methoxy group at time  $t$ , ( $I_{cis}$ - $I_{trans}$ ) corresponding  $^1\text{H}$  integral at  $t = 0$ . A rate constant of  $k = 0.949 \text{ [s}^{-1}\text{]}$  was determined from a linear fit of the  $\ln[(I_{cis}-I)/(I_{cis}-I_{trans})]/t$  curve. The half-life of **2** at 308 K in toluene was determined as 0.73 h.

## V.2 Arrhenius Plots in solution

### V.2.1 Compound 1: (Z)-12c-(8-methoxy-11,12-dihydrodibenzo[c,g][1,2]diazocin-2-yl)ethynyl-4,8,12-tri-*n*-octyl-4,8,12-triazatriangulene

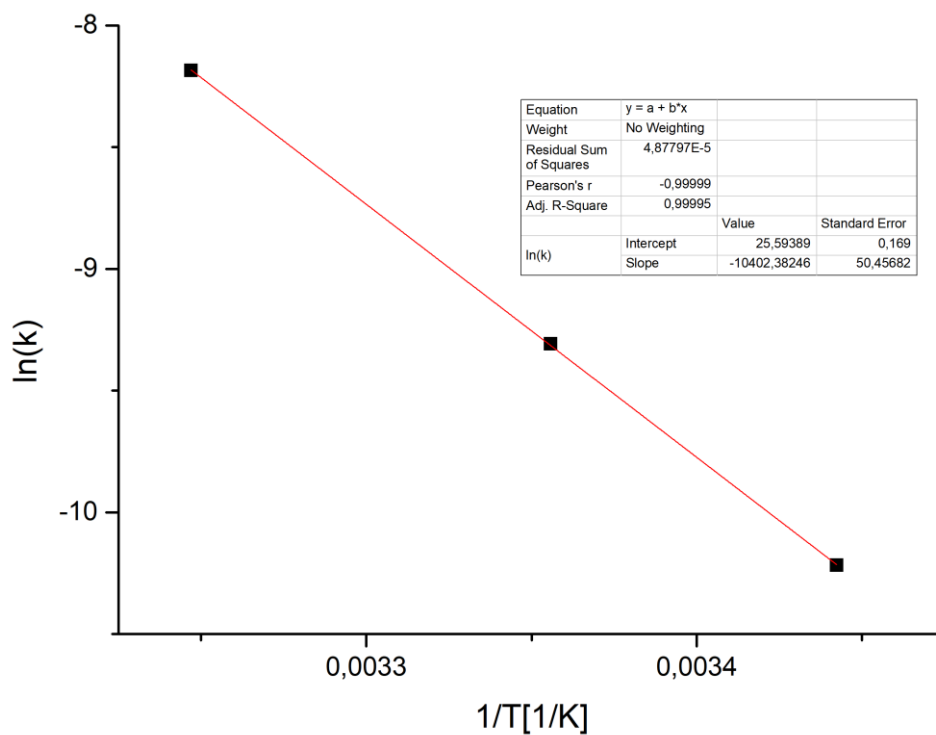

**Figure S23.** Arrhenius plot of the thermal isomerization of diazocine-TATA **1** in toluene- $d_8$  (2.05 mmol/L). An activation energy of 86.5 kJ/mol was determined from the linear fit.

**V.2.2 Compound 2: (Z)-12c-(9-methoxy-11,12-dihydrodibenzo[c,g][1,2]diazocin-3-yl)ethynyl-4,8,12-tri-*n*-octyl-4,8,12-triazatriangulene**

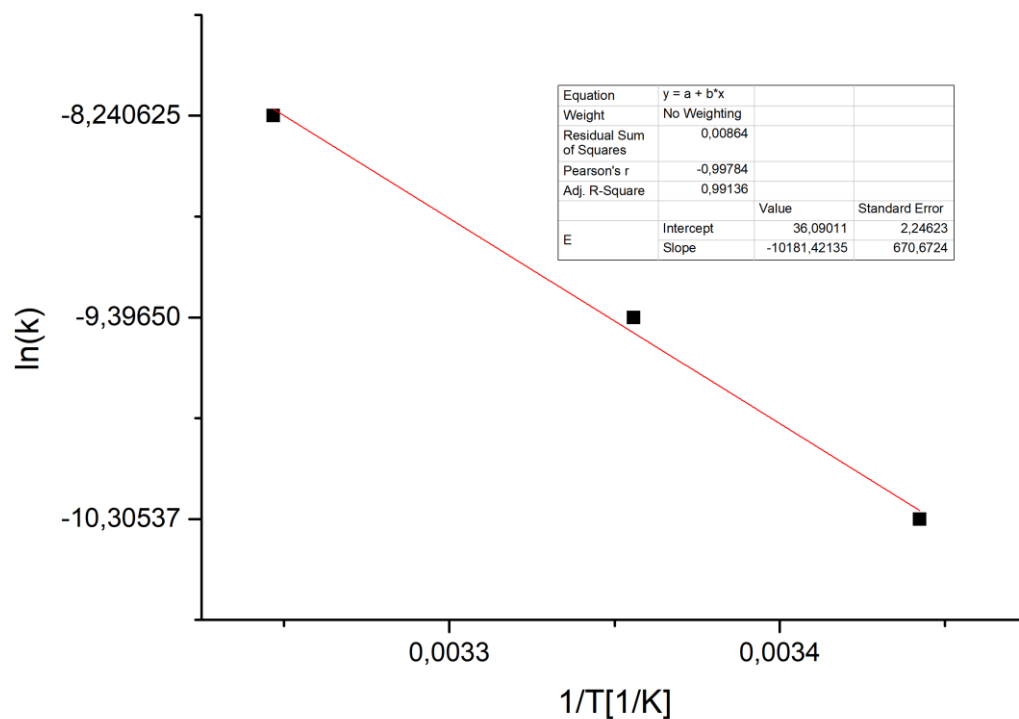

**Figure S24.** Arrhenius plot of the thermal isomerization of diazocine-TATA **1** in toluene- $d_8$  (2.27 mmol/L). An activation energy of 84.7 kJ/mol was determined from the linear fit.



## VI. Calculations

The geometry optimizations were carried out using density functional theory with the Minnesota functional M06-2X [4] including Grimmes D3 [5] dispersion correction and the large triple zeta basis def2-TZVP [6]. This theoretical level performed well in Grimme's latest study on basic properties of a large set of organic molecules [7]. The calculations were performed with Turbomole7.2 [8], including the m4 grid (in Turbomole nomenclature) and resolution-of-identity (RI) with multipole accelerated RI-J (marij) to speed up the calculations. All stationary points are characterized by frequency calculations.

### Coordinates

#### 1a *cis para*-diazocine platform molecule

E<sub>M062X-D3/def2TZVP</sub> = -1735.7479869

Nimag = 0

|   |            |           |            |   |            |            |            |   |            |            |            |
|---|------------|-----------|------------|---|------------|------------|------------|---|------------|------------|------------|
| C | 0.8423706  | 1.1888220 | -0.6747150 | H | -3.5272321 | 4.6583588  | 1.1749579  | C | -1.7241891 | -4.1607832 | 2.4452278  |
| C | -0.1996660 | 2.0068443 | -1.1074483 | C | 3.9125498  | -4.1448213 | 0.3982673  | C | -0.3444466 | -4.0889102 | 2.5578823  |
| C | -0.1398925 | 3.3967441 | -1.0422542 | C | 4.6345339  | -4.2440201 | -0.7810573 | C | 0.4109032  | -3.7338574 | 1.4403335  |
| C | 1.0223796  | 3.9601501 | -0.5091298 | C | 4.0471275  | -4.0005035 | -2.0127256 | H | -3.4428446 | -3.9956847 | 1.1611128  |
| C | 2.0852794  | 3.1594786 | -0.1005557 | C | 2.7057736  | -3.6212184 | -2.0624485 | N | 1.7986504  | -3.6621140 | 1.4954364  |
| C | 1.9973550  | 1.7838344 | -0.1632224 | C | 1.9807273  | -3.4750703 | -0.8830149 | H | 2.2277130  | -3.9774921 | 2.3498833  |
| H | -1.0914091 | 1.5383759 | -1.5056817 | C | 2.5715400  | -3.7649591 | 0.3435754  | N | 2.0648118  | -3.3781377 | -3.2723777 |
| H | 2.9819589  | 3.6400909 | 0.2693096  | H | 4.3769412  | -4.3609439 | 1.3520549  | H | 2.5885516  | -3.5904101 | -4.1056892 |
| C | -1.3105728 | 4.1869891 | -1.5808886 | H | 5.6758958  | -4.5362731 | -0.7404083 | N | -2.2006654 | -3.3137539 | -1.1070004 |
| C | -1.7461674 | 5.4307277 | -0.7760201 | H | 4.6160706  | -4.1032279 | -2.9281033 | H | -3.1844787 | -3.5174147 | -1.1741062 |
| H | -1.0924538 | 4.4946436 | -2.6076251 | C | 0.5801611  | -2.9076635 | -0.9274357 | H | -2.3115962 | -4.4356067 | 3.3117727  |
| H | -2.1542639 | 3.4983177 | -1.6405533 | C | -0.0865050 | -3.2926499 | -2.2284278 | H | 0.1467189  | -4.3085544 | 3.4973437  |
| C | -1.5420640 | 5.2802242 | 0.7041029  | C | -0.2242457 | -3.4401278 | 0.2368146  | H | -3.1193570 | 4.3721736  | 3.5712556  |
| H | -1.1986834 | 6.3052325 | -1.1276249 | C | 0.6802168  | -3.4448358 | -3.3805660 | H | 2.8166211  | 1.1625062  | 0.1714491  |
| H | -2.8003327 | 5.6183047 | -0.9827574 | C | 0.0558928  | -3.6574386 | -4.6095389 | C | 0.7345624  | -0.2343858 | -0.7608235 |
| C | -0.2844198 | 5.5415248 | 1.2574631  | C | -1.3272498 | -3.7326336 | -4.6601775 | C | 0.6573516  | -1.4322857 | -0.8353981 |
| N | 0.7413389  | 6.0835543 | 0.4087727  | C | -2.1007592 | -3.6268692 | -3.5146184 | O | -0.7193084 | 4.8615394  | 4.7621776  |
| N | 1.2900393  | 5.3763382 | -0.4349021 | C | -1.4719191 | -3.4135487 | -2.2880545 | H | -1.7112975 | 4.4038811  | 5.6523843  |
| C | -2.5394135 | 4.8649177 | 1.5709273  | H | 0.6499490  | -3.7641717 | -5.5083383 | C | -2.5641030 | 5.0876124  | 5.6803824  |
| C | -2.3125004 | 4.7020769 | 2.9341852  | H | -1.8132084 | -3.8967404 | -5.6133066 | H | -1.2455211 | 4.3680744  | 6.6333135  |
| C | -1.0516817 | 4.9786282 | 3.4537246  | H | -3.1789158 | -3.7116775 | -3.5641797 | H | -2.0578418 | 3.4040073  | 5.3772583  |
| C | -0.0360076 | 5.4225193 | 2.6090289  | C | -1.6068547 | -3.5584966 | 0.1271758  |   |            |            |            |
| H | 0.9345117  | 5.6637019 | 3.0215445  | C | -2.3664292 | -3.9129133 | 1.2420571  |   |            |            |            |

#### 1b *trans-twist para*-diazocine platform molecule

E<sub>M062x-D3/def2TZVP</sub> = -1735.735229021

Nimag = 0

|   |            |           |            |   |            |            |            |   |            |            |            |
|---|------------|-----------|------------|---|------------|------------|------------|---|------------|------------|------------|
| C | 0.8401254  | 0.1948635 | 0.0360794  | H | 1.1741032  | 7.6128466  | 1.0894853  | C | -1.8939926 | -4.2381829 | 1.3740998  |
| C | -0.2729335 | 1.0400154 | -0.0243101 | H | -2.6574324 | 6.7748141  | -1.9084151 | C | -2.6704482 | -4.4080346 | 2.5200733  |
| C | -0.1386510 | 2.4177595 | -0.1184809 | C | 3.5638146  | -5.2305087 | 1.7091597  | C | -2.0402677 | -4.5761731 | 3.7433375  |
| C | 1.1692801  | 2.9299883 | -0.1589074 | C | 4.2663082  | -5.5114055 | 0.5476077  | C | -0.6584129 | -4.6055172 | 3.8483196  |
| C | 2.2860807  | 2.1127853 | -0.1424469 | C | 3.6905641  | -5.3535140 | -0.7035748 | C | 0.1139022  | -4.4345541 | 2.6994767  |
| C | 2.1232416  | 0.7436426 | -0.0203797 | C | 2.3831539  | -4.8759661 | -0.7939827 | H | -3.7506721 | -4.4106999 | 2.4483676  |
| H | -1.2612185 | 0.5966497 | -0.0038849 | C | 1.6815291  | -4.5471477 | 0.3626292  | N | 1.5031637  | -4.4697177 | 2.7472178  |
| H | 3.2718125  | 2.6432411 | -0.2131845 | C | 2.2567143  | -4.7528786 | 1.6135244  | H | 1.9131286  | -4.7240231 | 3.6308465  |
| C | -1.3762462 | 3.3088971 | -0.2078395 | H | 4.0166120  | -5.3816756 | 2.6808333  | N | 1.7533543  | -4.7140140 | -2.0231881 |
| C | -1.3958483 | 4.4404894 | -1.2796657 | H | 5.2813791  | -5.8800634 | 0.6200090  | H | 2.2519580  | -5.0547658 | -2.8288416 |
| H | -1.5828978 | 3.7407077 | 0.7731500  | H | 4.2410387  | -5.6009943 | -1.6023805 | N | -2.4760349 | -4.0792681 | 0.1203924  |
| H | -2.2121142 | 2.6432411 | -0.4262808 | C | 0.3289959  | -3.8804263 | 0.2572901  | H | -3.4736538 | -4.2078232 | 0.0747186  |
| C | -1.0454856 | 5.8625000 | -0.8489445 | C | -0.3762696 | -4.3491317 | -0.9954210 | H | -2.6411549 | -4.7051841 | 4.6343589  |
| H | -2.4099923 | 4.4858328 | -1.6793384 | C | -0.5054668 | -4.2208910 | 1.4711478  | H | -0.1789633 | -4.7616051 | 4.8063518  |
| H | -0.7578972 | 4.1453934 | -2.1157176 | C | 0.3668245  | -4.6830394 | -2.1244616 | H | -2.1184867 | 9.0621580  | -1.2483986 |
| C | 0.0446053  | 6.1544622 | -0.0072817 | C | -0.2819383 | -4.9747604 | -3.3241070 | H | 2.9820643  | 0.0874583  | 0.0154085  |
| N | 0.6676551  | 4.9751295 | 0.4861435  | C | -1.6670613 | -4.9435670 | -3.3672287 | C | 0.6625517  | -1.2214745 | 0.1247796  |
| N | 1.2069869  | 4.3266472 | -0.4148385 | C | -2.4206648 | -4.6546030 | -2.2400173 | C | 0.5137014  | -2.4133541 | 0.1878260  |
| C | -1.8014483 | 6.9456693 | -1.2654587 | C | -1.7673524 | -4.3637036 | -1.0426123 | O | -0.0431878 | 9.7250870  | 0.3812710  |
| C | -1.4995793 | 8.2533712 | -0.8897991 | H | 0.2940887  | -5.2256625 | -4.2058178 | C | -0.7941606 | 10.8319233 | -0.0627180 |
| C | -0.4193272 | 8.4956810 | -0.0487556 | H | -2.1720674 | -5.1679745 | -4.2978623 | H | -0.7673156 | 10.9161225 | -1.1524606 |
| C | 0.3481191  | 7.4278275 | 0.4164893  | H | -3.5024669 | -4.6564358 | -2.2814871 | H | -0.3318585 | 11.7103496 | 0.3792683  |

H -1.8338887 10.7629892 0.2688271

### 1c *trans-chair para*-diazocine platform molecule

E<sub>M062x-D3/def2TZVP</sub> = -1735.731545735

Nimag = 0

|   |            |           |            |   |            |            |            |   |            |            |            |
|---|------------|-----------|------------|---|------------|------------|------------|---|------------|------------|------------|
| C | 0.7082396  | 0.2261391 | 0.3888250  | H | -3.0801986 | 6.7293631  | -0.9492613 | C | -2.0940015 | -4.9238661 | 3.6041398  |
| C | -0.4046217 | 1.0614675 | 0.2314074  | C | 3.5743751  | -5.1778347 | 1.6618947  | C | -0.7147348 | -4.8982802 | 3.7399250  |
| C | -0.2849941 | 2.4414148 | 0.2850565  | C | 4.3126377  | -5.3407285 | 0.4998894  | C | 0.0722537  | -4.6091744 | 2.6252323  |
| C | 1.0007728  | 2.9625528 | 0.4950667  | C | 3.7562225  | -5.1153072 | -0.7495741 | H | -3.7829147 | -4.7398869 | 2.2837639  |
| C | 2.1123435  | 2.1672652 | 0.6774918  | C | 2.4308280  | -4.6891601 | -0.8360845 | N | 1.4605433  | -4.5859946 | 2.7037064  |
| C | 1.9642902  | 0.7891610 | 0.6158220  | C | 1.6909782  | -4.4801618 | 0.3245306  | H | 1.8630241  | -4.8885180 | 3.5755163  |
| H | -1.3765155 | 0.6102457 | 0.0722836  | C | 2.2491018  | -4.7524653 | 1.5704019  | N | 1.8207175  | -4.4604832 | -2.0646164 |
| H | 3.0803611  | 2.6185564 | 0.8488864  | H | 4.0140529  | -5.3795116 | 2.6304364  | H | 2.3506686  | -4.7175443 | -2.8812164 |
| C | -1.5061101 | 3.3514154 | 0.2289882  | H | 5.3414802  | -5.6696257 | 0.5691698  | N | -2.4773722 | -4.1802558 | 0.0176199  |
| C | -1.6607090 | 4.3745881 | -0.9415195 | H | 4.3367669  | -5.2682985 | -1.6506197 | H | -3.4666843 | -4.3500615 | -0.0617535 |
| H | -1.5656470 | 3.8990432 | 1.1732130  | C | 0.3127289  | -3.8653812 | 0.2367203  | H | -2.7062303 | -5.1471152 | 4.4684313  |
| H | -2.3764585 | 2.6950228 | 0.1951461  | C | -0.3442793 | -4.2665333 | -1.0642772 | H | -0.2482327 | -5.1022131 | 4.6953042  |
| C | -1.1663037 | 5.8043388 | -0.7656366 | C | -0.5305801 | -4.3325596 | 1.4012316  | H | -2.2460488 | 9.0242121  | -0.8319690 |
| H | -2.7274781 | 4.4439738 | -1.1594537 | C | 0.4365903  | -4.4806247 | -2.1968641 | H | 2.8198825  | 0.1391608  | 0.7391279  |
| H | -1.1907471 | 3.9507376 | -1.8329601 | C | -0.1730496 | -4.7078390 | -3.4304774 | C | 0.5573863  | -1.1953463 | 0.3306599  |
| C | 0.2023232  | 6.0942363 | -0.6210724 | C | -1.5569448 | -4.7354486 | -3.5047030 | C | 0.4404436  | -2.3915078 | 0.2864734  |
| N | 0.9487146  | 4.8766153 | -0.5838408 | C | -2.3461503 | -4.5684054 | -2.3773795 | O | 0.3839256  | 9.6744167  | -0.5924437 |
| N | 0.9462892  | 4.3884030 | 0.5463486  | C | -1.7319121 | -4.3403067 | -1.1460741 | C | -0.4759518 | 10.7901697 | -0.6398201 |
| C | -2.0148260 | 6.8953695 | -0.8368125 | H | 0.4325221  | -4.8623801 | -4.3146005 | H | -1.0379749 | 10.8166874 | -1.5770790 |
| C | -1.5428375 | 8.2069148 | -0.7754406 | H | -2.0316730 | -4.9100628 | -4.4615777 | H | 0.1608989  | 11.6680495 | -0.5756017 |
| C | -0.1791626 | 8.4431141 | -0.6536034 | H | -3.4256106 | -4.6166721 | -2.4445513 | H | -1.1750720 | 10.7851469 | 0.2009318  |
| C | 0.7104348  | 7.3675658 | -0.5800397 | C | -1.9144591 | -4.4048704 | 1.2698584  |   |            |            |            |
| H | 1.7703948  | 7.5530838 | -0.4742390 | C | -2.7057063 | -4.6940063 | 2.3816618  |   |            |            |            |

### 1 TS *twist2cis para*-diazocine platform molecule

E<sub>M062x-D3/def2TZVP</sub> = -1735.699182956

Nimag = 1 (XXX)

|   |            |           |            |   |            |            |            |   |            |            |            |
|---|------------|-----------|------------|---|------------|------------|------------|---|------------|------------|------------|
| C | 0.3680808  | 3.0635202 | -1.7967020 | H | -0.9593991 | 4.0757152  | -3.1961138 | C | -3.3844571 | -4.3688074 | -1.3786551 |
| H | 1.4206581  | 3.3321159 | -1.9122578 | H | -1.3122196 | 4.4290282  | -1.5196740 | C | -2.7635184 | -4.0658609 | -0.1670248 |
| H | 0.1870829  | 2.2465766 | -2.4948836 | O | 3.2142652  | 8.5378853  | -2.4446310 | H | -0.6182965 | -4.9748522 | -3.2610530 |
| C | 1.5150269  | 7.2471821 | -3.6040155 | C | 3.4409836  | 9.2685310  | -3.6271398 | H | -3.0810260 | -4.9079900 | -3.4220505 |
| C | 0.5711058  | 6.2222035 | -3.5199735 | H | 4.2160590  | 9.9932868  | -3.3929059 | H | -4.4646521 | -4.3669946 | -1.4502161 |
| C | 0.3483589  | 5.5219119 | -2.3548531 | H | 3.7849098  | 8.6185118  | -4.4362434 | C | -2.9554900 | -3.9053726 | 2.2436902  |
| C | 1.0645587  | 5.9255925 | -1.1951874 | H | 2.5370770  | 9.7939634  | -3.9469266 | C | -3.7626836 | -4.0525310 | 3.3715127  |
| C | 2.0245940  | 6.9382330 | -1.2563942 | C | -2.0025532 | 0.5049472  | 0.9612639  | C | -3.1657951 | -4.2001418 | 4.6138920  |
| C | 2.2557916  | 7.5756926 | -2.4706701 | C | 2.4895026  | -4.8998917 | 2.7418355  | C | -1.7871955 | -4.2313172 | 4.7567481  |
| C | 0.1568622  | 2.5000834 | -0.4078982 | C | 3.2222827  | -5.2009076 | 1.6042425  | C | -0.9839561 | -4.0828977 | 3.6262269  |
| N | 0.7453893  | 5.2639332 | -0.0846180 | C | 2.6809430  | -5.0620322 | 0.3356202  | H | -4.8406042 | -4.0527639 | 3.2711848  |
| N | 0.1954972  | 4.6962046 | 0.8387140  | C | 1.3783239  | -4.5821830 | 0.2022019  | N | 0.4038289  | -4.1172850 | 3.7118856  |
| C | 0.1274746  | 3.2532519 | 0.7772774  | C | 0.6465310  | -4.2344514 | 1.3341981  | H | 0.7889869  | -4.3607933 | 4.6097254  |
| C | -0.0218188 | 1.1277480 | -0.2776612 | C | 1.1870723  | -4.4209895 | 2.6034216  | N | 0.7827099  | -4.4360360 | -1.0463831 |
| C | -0.2307323 | 1.2843465 | 2.1192757  | H | 2.9158329  | -5.0356485 | 3.7276160  | H | 1.3015911  | -4.7930127 | -1.8320117 |
| C | -0.0876462 | 2.6528749 | 0.0121935  | H | 4.2340577  | -5.5703028 | 1.7098117  | N | -3.5022211 | -3.7674134 | 0.9725318  |
| H | 1.6748239  | 7.7496302 | -4.5452462 | H | 3.2553655  | -5.3243057 | -0.5437306 | H | -4.4998958 | -3.8822935 | 0.9006233  |
| H | 0.0278154  | 5.9351164 | -4.4133732 | C | -0.7029324 | -3.5698917 | 1.1822805  | H | -3.7906782 | -4.3115957 | 5.4905843  |
| H | 2.5754089  | 7.2395767 | -0.3776367 | C | -1.3739700 | -4.0543798 | -0.0824149 | H | -1.3342079 | -4.3717034 | 5.7299641  |
| H | -0.0246564 | 0.5086138 | -1.1662823 | C | -1.5699436 | -3.8903029 | 2.3782215  | C | -0.3696216 | -0.9118524 | 1.0349016  |
| H | -0.3831785 | 0.8111169 | 3.0794798  | C | -0.6008122 | -4.4047363 | -1.1858380 | C | -0.5157470 | -2.1039058 | 1.0999901  |
| H | -0.1375282 | 3.2948706 | 2.8825064  | C | -1.2174065 | -4.7100340 | -2.3990481 |   |            |            |            |
| C | -0.4954302 | 4.2871743 | -2.2331561 | C | -2.6008789 | -4.6739611 | -2.4807512 |   |            |            |            |

### 2a *cis meta*-diazocine platform molecule

E<sub>M062x-D3/def2TZVP</sub> = -1735.747650270

Nimag = 0

|   |            |           |            |   |            |            |            |   |            |            |            |
|---|------------|-----------|------------|---|------------|------------|------------|---|------------|------------|------------|
| C | 0.1005678  | 2.0463851 | -1.6611740 | N | 2.0108712  | 3.5881256  | 1.7613586  | C | 0.0353231  | -3.2679406 | -2.4425163 |
| C | 0.1244073  | 3.4153545 | -1.4781007 | C | -1.8264152 | 5.6321308  | 2.0079822  | C | -0.0786814 | -3.4833737 | 0.0191137  |
| C | 0.7130306  | 4.0163742 | -0.3630355 | C | -2.6969736 | 4.8639713  | 2.7811628  | C | 0.8015296  | -3.3523428 | -3.6018550 |
| C | 1.2868067  | 3.1637902 | 0.5831543  | C | -2.2029403 | 3.8069115  | 3.5858527  | C | 0.1811351  | -3.5685847 | -4.8323503 |
| C | 1.2988344  | 1.7871428 | 0.3978979  | C | -0.8410511 | 3.5297002  | 3.5119781  | C | -1.1965427 | -3.7149123 | -4.8774026 |
| C | 0.6918946  | 1.2092155 | -0.7130393 | H | -0.4364720 | 2.7266271  | 4.1144295  | C | -1.9670395 | -3.6775307 | -3.7255399 |
| H | -0.3378961 | 4.0541600 | -2.2213399 | H | -2.2356606 | 6.4635855  | 1.4668042  | C | -1.3422967 | -3.4604759 | -2.4974708 |
| H | 1.7871697  | 1.1619962 | 1.1338705  | C | 4.0897990  | -3.9732270 | 0.1421640  | H | 0.7740172  | -3.6230725 | -5.7365064 |
| C | 0.7099925  | 5.5242194 | -0.2786540 | C | 4.8082534  | -4.0066847 | -1.0429093 | H | -1.6794883 | -3.8821422 | -5.8315473 |
| C | 0.4815875  | 6.1424476 | 1.1150637  | C | 4.2012367  | -3.7644020 | -2.2653270 | H | -3.0395489 | -3.8177913 | -3.7713730 |
| H | 1.6510426  | 5.9104667 | -0.6810430 | C | 2.8420994  | -3.4536913 | -2.2988122 | C | -1.4543099 | -3.6684836 | -0.0855904 |
| H | -0.0769943 | 5.8768182 | -0.9470539 | C | 2.1181236  | -3.3737001 | -1.1125317 | C | -2.1878228 | -4.0825863 | 1.0260646  |
| C | -0.4742917 | 5.3447437 | 1.9565171  | C | 2.7309982  | -3.6613529 | 1.0366300  | C | -1.5260397 | -4.3208304 | 2.2205889  |
| H | 1.4327406  | 6.2320394 | 1.6393818  | H | 4.5710484  | -4.1868645 | 1.0881025  | C | -0.1507140 | -4.1830826 | 2.3270657  |
| H | 0.0967099  | 7.1536497 | 0.9821977  | H | 5.8635872  | -4.2451046 | -1.0148008 | C | 0.5786095  | -3.7681373 | 1.2128009  |
| C | 0.0059671  | 4.2661577 | 2.7064472  | H | 4.7690474  | -3.8147211 | -3.1856659 | H | -3.2594800 | -4.2162373 | 0.9499809  |
| N | 1.4213897  | 4.0190734 | 2.7520312  | C | 0.6889933  | -2.8809961 | -1.1359764 | N | 1.9610137  | -3.6247413 | 1.2618042  |

|   |            |            |            |   |            |            |            |   |            |           |           |
|---|------------|------------|------------|---|------------|------------|------------|---|------------|-----------|-----------|
| H | 2.4118516  | -3.9345560 | 2.1070827  | H | 0.3566416  | -4.3956912 | 3.2595875  | C | -4.9167402 | 4.4812763 | 3.5077115 |
| N | 2.1813889  | -3.2148393 | -3.4994084 | C | 0.6842865  | -1.4072352 | -0.9999765 | H | -5.8942076 | 4.9215863 | 3.3313237 |
| H | 2.7099417  | -3.3819104 | -4.3399593 | C | 0.6860142  | -0.2113059 | -0.8745509 | H | -4.6799219 | 4.5375812 | 4.5736596 |
| N | -2.0670041 | -3.4282827 | -1.3108427 | H | -0.3703190 | 1.6143836  | -2.5337616 | H | -4.9281323 | 3.4333820 | 3.1952714 |
| H | -3.0412989 | -3.6733052 | -1.3771396 | H | -2.8539400 | 3.2060591  | 4.1558922  |   |            |           |           |
| H | -2.0935535 | -4.6405729 | 3.0848896  | O | -4.0021655 | 5.2313538  | 2.7416285  |   |            |           |           |

## 2b *trans-twist meta-diazocine platform molecule*

E<sub>M062x-D3/def2TZVP</sub> = -1735.735003400

Nimag = 0

|   |            |           |            |   |            |            |            |   |            |            |            |
|---|------------|-----------|------------|---|------------|------------|------------|---|------------|------------|------------|
| C | -2.1201189 | 1.1640095 | 0.3349273  | H | 4.2233081  | 4.8903872  | 1.6343800  | C | -1.5813166 | -4.4709512 | -3.7870490 |
| C | -2.0441739 | 2.5472550 | 0.4061257  | H | 5.0296099  | 7.1500063  | 1.0441630  | C | -2.9614729 | -4.5783564 | -3.8587020 |
| C | -0.8270935 | 3.2145272 | 0.3230141  | H | 1.3632781  | 7.8987385  | -1.0316748 | C | -3.7547439 | -4.4885414 | -2.7254234 |
| C | 0.3189743  | 2.4198439 | 0.1554423  | O | 3.5663912  | 8.9162750  | -0.4230688 | C | -3.1500815 | -4.2583607 | -1.4899072 |
| C | 0.2658510  | 1.0463880 | 0.0392032  | C | 4.8167397  | 9.4175165  | -0.0094065 | H | -0.9712587 | -4.5650708 | -4.6764685 |
| C | -0.9668891 | 0.3987491 | 0.1512976  | H | 4.8900513  | 9.4457824  | 1.0812618  | H | -3.4288887 | -4.7549405 | -4.8188167 |
| H | -3.0763636 | 0.6637760 | 0.4063100  | H | 4.8849324  | 10.4283219 | -0.4021967 | H | -4.8298392 | -4.5975954 | -2.7915149 |
| H | -2.9545174 | 3.1229730 | 0.5277103  | H | 5.6368064  | 8.8160132  | -0.4108599 | C | -3.3186930 | -4.4013471 | 0.9233912  |
| H | 1.1706741  | 0.4763477 | -0.1233989 | C | -1.0401240 | -1.0267811 | 0.0648989  | C | -4.0870360 | -4.7693676 | 2.0277829  |
| C | -0.7594651 | 4.7373026 | 0.3952480  | C | -1.0894704 | -2.2260766 | -0.0088607 | C | -3.4577002 | -4.9987404 | 3.2414473  |
| C | 0.1419966  | 5.4914029 | -0.6287705 | C | 2.2092428  | -4.8554828 | 1.2801515  | C | -2.0817637 | -4.8958517 | 3.3747525  |
| H | -0.4746584 | 5.0371531 | 1.4064247  | C | 2.9515644  | -4.9384196 | 0.1123476  | C | -1.3176054 | -4.5274066 | 2.2675762  |
| H | -1.7796641 | 5.0957765 | 0.2527965  | C | 2.3773709  | -4.7119779 | -1.1288916 | H | -5.1600369 | -4.8761676 | 1.9309700  |
| H | 1.5341116  | 5.9330840 | -0.1804562 | C | 1.0278230  | -4.3666047 | -1.1999369 | N | 0.0670082  | -4.4247611 | 2.3431776  |
| H | -0.3872137 | 6.4014109 | -0.9138505 | C | 0.2812975  | -4.2368301 | -0.0321556 | H | 0.4907396  | -4.7235177 | 3.2061270  |
| H | 0.2279727  | 4.8943782 | -1.5385119 | C | 0.8599973  | -4.5097456 | 1.2041016  | N | 0.3998080  | -4.1403675 | -2.4200155 |
| C | 2.3922304  | 5.1013830 | 0.5657239  | H | 2.6643420  | -5.0572791 | 2.2415058  | H | 0.9408966  | -4.3425779 | -3.2447035 |
| N | 1.7936363  | 3.8652328 | 0.9362226  | H | 3.9993015  | -5.2037807 | 0.1696615  | N | -3.8988187 | -4.1731661 | 3.3747525  |
| N | 1.4842046  | 3.2043174 | -0.0606603 | H | 2.9628532  | -4.8018011 | -2.0351253 | H | -4.8770293 | -4.3974894 | -0.4020633 |
| C | 1.9837288  | 7.2076388 | -0.4741841 | C | -1.1313215 | -3.7028733 | -0.0990262 | H | -4.0520136 | -5.2831363 | 4.1001247  |
| C | 3.2415142  | 7.6509661 | -0.0576418 | C | -1.7688725 | -4.1052817 | -1.4094306 | H | -1.6002797 | -5.1009146 | 4.3224631  |
| C | 4.0608894  | 6.8208816 | 0.6990162  | C | -1.9409540 | -4.2514505 | 1.0537321  |   |            |            |            |
| C | 3.6115521  | 5.5463920 | 1.0289074  | C | -0.9812203 | -4.2412175 | -2.5492410 |   |            |            |            |

## 2c *trans-chair meta-diazocine platform molecule*

E<sub>M062x-D3/def2TZVP</sub> = -1735.731545735

Nimag = 0

|   |            |           |            |   |            |            |            |   |            |            |            |
|---|------------|-----------|------------|---|------------|------------|------------|---|------------|------------|------------|
| C | 0.7082396  | 0.2261391 | 0.3888250  | H | -3.0801986 | 6.7293631  | -0.9492613 | C | -2.0940015 | -4.9238661 | 3.6041398  |
| C | -0.4046217 | 1.0614675 | 0.2314074  | C | 3.5743751  | -5.1778347 | 1.6618947  | C | -0.7147348 | -4.8982802 | 3.7399250  |
| C | -0.2849941 | 2.4414148 | 0.2850565  | C | 4.3126377  | -5.3407285 | 0.4998894  | C | 0.0722537  | -4.6091744 | 2.6252323  |
| C | 1.0007728  | 2.9625528 | 0.4950667  | C | 3.7562225  | -5.1153072 | -0.7495741 | H | -3.7829147 | -4.7398869 | 2.2837639  |
| C | 2.1123435  | 2.1672652 | 0.6774918  | C | 2.4308280  | -4.6891601 | -0.8360845 | N | 1.4605433  | -4.5859946 | 2.7037064  |
| C | 1.9642902  | 0.7891610 | 0.6158220  | C | 1.6909782  | -4.4801618 | 0.3245306  | H | 1.8630241  | -4.8885180 | 3.5755163  |
| H | -1.3765155 | 0.6102457 | 0.0722836  | C | 2.2491018  | -4.7524653 | 1.5704019  | N | 1.8207175  | -4.4604832 | -2.0646164 |
| H | 3.0803611  | 2.6185564 | 0.8488864  | H | 4.0140529  | -5.3795116 | 2.6304364  | H | 2.3506686  | -4.7175443 | -2.8812164 |
| C | -1.5061101 | 3.3514154 | 0.2289882  | H | 5.3414802  | -5.6696257 | 0.5691698  | N | -2.4773722 | -4.1802558 | 0.0176199  |
| C | -1.6607090 | 4.3745881 | -0.9415195 | H | 4.3367669  | -5.2682985 | -1.6506197 | H | -3.4666843 | -4.3500615 | -0.0617535 |
| H | -1.5656470 | 3.8990432 | 1.1732130  | C | 0.3127289  | -3.8653812 | 0.2367203  | H | -2.7062303 | -5.1471152 | 4.4684313  |
| H | -2.3764585 | 2.6950228 | 0.1951461  | C | -0.3442793 | -4.2665333 | -1.0642772 | H | -0.2482327 | -5.1022131 | 4.6953042  |
| C | -1.1663037 | 0.7891610 | 0.6158220  | C | -0.5305801 | -4.3325596 | 1.4012316  | H | -2.2460488 | 9.0242121  | -0.8319690 |
| H | -2.7274781 | 4.4439738 | -1.1594537 | C | 0.4365903  | -4.4806247 | -2.1968641 | H | 2.8198825  | 0.1391608  | 0.7391279  |
| H | -1.1907471 | 3.9507376 | -1.8329601 | C | -0.1730496 | -4.7078390 | -3.4304774 | C | 0.5573863  | -1.1953463 | 0.3306599  |
| C | 0.2023232  | 6.0942363 | -0.6210724 | C | -1.5569448 | -4.7354486 | -3.5047030 | C | 0.4404436  | -2.3915078 | 0.2864734  |
| N | 0.9487146  | 4.8766153 | -0.5838408 | C | -2.3461503 | -4.5684054 | -2.3773795 | O | 0.3839256  | 9.6744167  | -0.5924437 |
| N | 0.9462892  | 4.3884030 | 0.5463486  | C | -1.7319121 | -4.3403067 | -1.1460741 | C | -0.4759518 | 10.7901697 | -0.6398201 |
| C | -2.0148260 | 6.8953695 | -0.8368125 | H | 0.4325221  | -4.8623801 | -4.3146005 | H | -1.0379749 | 10.8166874 | -1.5770790 |
| C | -1.5428375 | 8.2069148 | -0.7754406 | H | -2.0316730 | -4.9100628 | -4.4615777 | H | 0.1608989  | 11.6680495 | -0.5756017 |
| C | -0.1791626 | 8.4431141 | -0.6536034 | H | -3.4256106 | -4.6166721 | -2.4445513 | H | -1.1750720 | 10.7851469 | 0.2009318  |
| C | 0.7104348  | 7.3675658 | -0.5800397 | C | -1.9144591 | -4.4048704 | 1.2698584  |   |            |            |            |
| H | 1.7703948  | 7.5530838 | -0.4742390 | C | -2.7057063 | -4.6940063 | 2.3816618  |   |            |            |            |

## TS *twist2cis meta-diazocine platform molecule*

E<sub>M062x-D3/def2TZVP</sub> = -1735.698417078

Nimag = 3 (-463.03; -18.65; -2.32 cm<sup>-1</sup>)

|   |           |           |            |   |            |           |            |   |            |            |            |
|---|-----------|-----------|------------|---|------------|-----------|------------|---|------------|------------|------------|
| C | 0.4799215 | 4.6077299 | -1.0428513 | N | 0.1460550  | 3.0388924 | 1.6188545  | H | -0.8493481 | 6.3246529  | -0.8705902 |
| H | 1.5222966 | 4.8365489 | -0.8076583 | C | 0.1601110  | 2.4172185 | 0.3088229  | H | -1.2692739 | 5.0063543  | 0.2002082  |
| H | 0.3519139 | 4.8427689 | -2.0994513 | C | 0.1568715  | 2.3517604 | -2.0646549 | O | 3.1040306  | 7.7095069  | 3.6390832  |
| C | 1.4973969 | 8.1459795 | 1.8710647  | C | -0.1240261 | 0.3010979 | -0.8239645 | C | 3.3534692  | 9.0928038  | 3.7289544  |
| C | 0.5952935 | 7.6009605 | 0.9560476  | C | -0.0531469 | 1.0479938 | 0.3489530  | H | 4.0990851  | 9.2172372  | 4.5095784  |
| C | 0.3644579 | 6.2456689 | 0.8695926  | H | 1.6660685  | 9.2113567 | 1.8840302  | H | 3.7446132  | 9.4875180  | 2.7873006  |
| C | 1.0246275 | 5.4037812 | 1.8052373  | H | 0.0947795  | 8.2612853 | 0.2566753  | H | 2.4475795  | 9.6415438  | 4.0009548  |
| C | 1.9419284 | 5.9222488 | 2.7217206  | H | 2.4496623  | 5.2811995 | 3.4271215  | C | -0.0172281 | 0.9777680  | -2.0401502 |
| C | 2.1865545 | 7.2913146 | 2.7289713  | H | 0.2131162  | 2.8546373 | -3.0228562 | C | 2.4232220  | -5.1695126 | 0.9080849  |
| C | 0.2627984 | 3.1169252 | -0.9037511 | H | -0.1643234 | 0.5727886 | 1.3150540  | C | 3.1714259  | -5.4707343 | -0.2193676 |
| N | 0.6974296 | 4.1155555 | 1.7230108  | C | -0.4253919 | 5.5679075 | -0.2110369 | C | 2.6552021  | -5.3103711 | -1.4958937 |

|   |            |            |            |   |            |            |            |   |            |            |            |
|---|------------|------------|------------|---|------------|------------|------------|---|------------|------------|------------|
| C | 1.3632179  | -4.8074844 | -1.6473329 | C | -3.3651688 | -4.4876107 | -3.3113904 | H | 0.6983818  | -4.6185056 | 2.7515772  |
| C | 0.6170237  | -4.4589826 | -0.5251350 | C | -2.7607848 | -4.2079487 | -2.0858075 | N | 0.7929774  | -4.6382656 | -2.9048351 |
| C | 1.1312007  | -4.6682404 | 0.7515975  | H | -0.5771265 | -5.1283003 | -5.1492822 | H | 1.3189669  | -4.9971936 | -3.6847541 |
| H | 2.8296724  | -5.3219104 | 1.8997767  | H | -3.0349356 | -5.0137972 | -5.3540457 | N | -3.5146759 | -3.9085644 | -0.9567422 |
| H | 4.1752428  | -5.8571539 | -0.0996717 | H | -4.4437291 | -4.4654312 | -3.4020525 | H | -4.5128435 | -4.0034988 | -1.0481155 |
| H | 3.2408962  | -5.5730393 | -2.3676682 | C | -2.9941002 | -4.0714820 | 0.3226532  | H | -3.8962065 | -4.4955385 | 3.5492407  |
| C | -0.7162267 | -3.7662612 | -0.6934121 | C | -3.8245367 | -4.2152921 | 1.4337832  | H | -1.4462945 | -4.6047040 | 3.8324077  |
| C | -1.3729216 | -4.2227615 | -1.9759393 | C | -3.2534891 | -4.3874558 | 2.6851476  | C | -0.3249636 | -1.1136338 | -0.7831670 |
| C | -1.6112999 | -4.0850220 | 0.4822614  | C | -1.8786421 | -4.4466038 | 2.8526059  | C | -0.4987671 | -2.3029686 | -0.7490388 |
| C | -0.5867566 | -4.5777178 | -3.0686879 | C | -1.0521531 | -4.3019687 | 1.7385257  | H | -0.0872305 | 0.4193083  | -2.9640899 |
| C | -1.1868169 | -4.8599145 | -4.2958372 | H | -4.9002516 | -4.1930909 | 1.3138813  |   |            |            |            |
| C | -2.5676338 | -4.7971328 | -4.4021645 | N | 0.3328030  | -4.3642201 | 1.8486167  |   |            |            |            |

## References

- [1] Wahhab, A.; Therrien, E.; inventor; Methylgene Inc., assignee. Small Molecule Inhibitors of Protein Arginine methyltransferases. WO 2008104077 (A1). 2007-02-28.
- [2] Laursen, B. W.; Krebs, F. C. *Chem. Eur. J.* **2001**, *7*, 1773-1783.
- [3] Park, K.; Lee, B. M. inventor; Yuhan Corp., assignee. Novel phenylethynyl benzamide glucokinase activator and method for preparing same. WO 2014112798 (A1). 2013-01-16.
- [4] Zhao, Y.; Truhlar, D. G. *Theor. Chem. Account* **2008**, *120*, 215-241. <https://doi.org/10.1007/s00214-007-0310-x>.
- [5] Grimme, S.; Antony, J.; Ehrlich, S.; Krieg, H. *J. Chem. Phys.* **2010**, *132*, 154104. DOI: 10.1063/1.3382344
- [6] Weigend, F.; Häser, M.; Patzelt, H.; Ahlrichs, R. *Chem. Phys. Lett.* **1998**, *294*, 143-152.
- [7] Goerigk, L.; Hansen, A.; Bauer, C.; Ehrlich, S.; Najibi, A.; Grimme, S. *Phys. Chem. Chem. Phys.* **2017**, *19*, 32184–32215.
- [8] Turbomole7.2: TURBOMOLE V7.2 2017, a development of University of Karlsruhe and Forschungszentrum Karlsruhe GmbH, 1989-2007, TURBOMOLE GmbH, since 2007; available from <http://www.turbomole.com>.
